# Maturation of prefrontal input to dorsal raphe nucleus increases behavioral persistence in mice

Nicolas Gutierrez-Castellanos<sup>1,2</sup>, Dario Sarra<sup>1,2</sup>, Beatriz S. Godinho<sup>1,3</sup> and Zachary F. Mainen<sup>1\*</sup>

1. Champalimaud Research, Champalimaud Foundation, Lisboa, Portugal.

2. These authors contributed equally.

3. Current affiliation: Nuffield Department of Clinical Neurosciences, University of Oxford, Oxford, UK.

\* Corresponding author: [zmainen@neuro.fchampalimaud.org](mailto:zmainen@neuro.fchampalimaud.org)

## Keywords

Cognitive development, optogenetic circuit mapping, foraging behavior, axonal development

## Abstract

1 The ability to persist towards a desired objective is a fundamental aspect of behavioral control  
2 whose impairment is implicated in several behavioral disorders. One of the prominent features  
3 of behavioral persistence is that its maturation occurs relatively late in development. This is

4 presumed to echo the developmental time course of a corresponding circuit within late-maturing  
5 parts of the brain, such as the prefrontal cortex, but the specific identity of the responsible  
6 circuits is unknown. Here, we describe the maturation of the projection from layer 5 neurons of  
7 the prefrontal cortex to the dorsal raphe nucleus in mice. We show using pathway-specific  
8 optogenetic stimulation that this connection undergoes a dramatic increase in synaptic potency  
9 between postnatal weeks 3 and 8, corresponding to the transition from juvenile to adult. We  
10 then show that this period corresponds to an increase in the behavioral persistence that mice  
11 exhibit in a foraging task. Finally, we use genetic targeting to selectively ablate this pathway in  
12 adulthood and show that mice revert to a behavioral phenotype similar to juveniles. These  
13 results suggest that the prefrontal to dorsal raphe pathway is a critical anatomical and functional  
14 substrate of the development and manifestation of behavioral control.

## Introduction

15 The emergence of behavioral control, including attention, patience, cognitive flexibility, and  
16 behavioral persistence, occurs during critical periods of postnatal development. In these  
17 phases, environment and experience contribute to the maturation of higher cognitive functions  
18 (Larsen and Luna, 2018; Mischel et al., 1989; Tooley et al., 2021), which sets the foundations of  
19 future social and cognitive abilities during adulthood (Casey et al., 2011; Moffitt et al., 2011).

20 Ethologically, the development of behavioral control is critical for selective fitness and, thus,  
21 survival. For instance, in the natural environment, food resources are often sparsely distributed  
22 and depleted with consumption. Therefore, the well-known tradeoff between exploiting a  
23 depleting resource and exploring in search of alternatives is crucial to reach an optimal foraging  
24 strategy and obtain the maximum amount of resources with minimal waste of physical effort.  
25 Therefore, a forager in a possibly depleted patch of food faces an important dilemma--to stay or

26 to leave--that calls for a careful balancing between persistence and flexibility (Charnov, 1976;  
27 Lottem et al., 2018; Morris and Davidson, 2000; Vertechi et al., 2020).

28 From a neural perspective, cognitive development correlates with large-scale synaptic and  
29 structural changes (Durston and Casey, 2006; Zuo et al., 2010, 2017) that are considered to  
30 underlie the emergence of increasing cognitive control over innate impulsive behavioral  
31 tendencies (Alexander-Bloch et al., 2013; Fair et al., 2009; Luna et al., 2001). A variety of  
32 evidence links the medial prefrontal cortex (mPFC) to the expression of behavioral control in a  
33 wide range of mammal species. For instance, humans and macaques with prefrontal cortical  
34 damage display deficits in behavioral flexibility, decision making, and emotional processing  
35 (Izquierdo et al., 2017; Rudebeck et al., 2013; Roberts et al., 1998), as well as a notable  
36 increase in impulsive behavior (Berlin, 2004; Dalley and Robbins, 2017; Fellows, 2006; Itami  
37 and Uno, 2002). In line with this, local pharmacological inhibition of mPFC significantly limits  
38 rats' ability to wait for a delayed reward (Murakami et al., 2017; Narayanan et al., 2006).

39

40 Crucially, the mPFC undergoes intense postnatal maturation from childhood to adulthood,  
41 particularly during adolescence (Chini & Hanganu-Opatz., 2021), which in humans spans from  
42 years ~10-18 of life and in mice from weeks ~3-8 of life, and is a period of intense somatic  
43 maturation, including sexual development (Bell, 2018).

44

45 The maturation of the mPFC includes structural and functional modifications that overlap in time  
46 with the development of patience and behavioral inhibition during childhood and adolescence  
47 (Chini and Hanganu-Opatz, 2021; Sakurai and Gamo, 2019). Although it has been long  
48 hypothesized that the neural changes occurring in the mPFC during development are central to  
49 the emergence of behavioral control (e.g. Durston and Casey, 2006; Sowell et al., 1999), the

50 specific plastic arrangements underlying behavioral control development remain poorly  
51 understood.

52

53 A number of studies have focused on the local changes of mPFC circuits, such as the changes  
54 in cortical thickness caused by cellular structural plasticity and synaptic pruning that are  
55 characteristic of early postnatal developmental phases in both humans and mice (Nagy et al.,  
56 2004; Alexander-Bloch, 2013; Ueda et al., 2015; Kolk & Rakic 2021), as a putative locus  
57 underlying cognitive development. More recently, studies in rodents have shed light on the  
58 development of long-range top-down mPFC extracortical connections as the putative origin of  
59 certain aspects of cognitive development (Klune et al., 2021). In particular, the development of  
60 mPFC afferents to the amygdala may shape the response to threats across different stages of  
61 development (Arruda-Carvalho et al., 2017; Dincheva et al., 2015; Gee et al., 2016), and the  
62 development of mPFC input onto the dorsal raphe nucleus (DRN) shapes the response to  
63 stress (Soiza-Reilly et al., 2019).

64 A growing body of evidence supports that 5HT neuron activity in the DRN is related to increases  
65 in the ability to wait for rewards (Fonseca et al., 2015; Lottem et al., 2018; Miyazaki et al., 2011,  
66 2018, 2014). This reflects a prolongation of the willingness of animals to engage in an active  
67 behavior such as foraging, rather than promotion of passivity (Lottem et al. 2018), and can also  
68 involve active overcoming of adverse situations (Nishitani et al., 2019; Ohmura et al., 2020,  
69 Warden et al., 2012).

70 The mPFC sends a dense glutamatergic projection to the DRN at the adult stage  
71 (Pollak Dorocic et al., 2014; Weissbourd et al., 2014; Zhou et al., 2017), which can  
72 bidirectionally modulate the activity of 5HT DRN neurons through monosynaptic excitation or  
73 disynaptic feedforward inhibition through local interneurons (Challis et al., 2014; Geddes et al.,  
74 2016; Maier, 2015; Warden et al., 2012). Selective optogenetic activation of the mPFC inputs to

75 the DRN elicits active behavioral responses in a challenging context (Warden et al., 2012), and  
76 perturbations in the development of this pathway lead to maladaptive anxiety levels (Soiza-  
77 Reilly et al., 2019).

78 Given the reciprocal connectivity between the mPFC and DRN (Puig and Gullledge, 2011) and  
79 that both areas causally modulate animals' ability to wait for delayed rewards (Ciaramelli et al.,  
80 2021; Fonseca et al., 2015; Miyazaki et al., 2011, 2018; Murakami et al., 2017; Schweighofer et  
81 al., 2008), it seems plausible that the maturation of mPFC input to the DRN over development  
82 could underlie the emergence of behavioral persistence in mice.

83 Therefore, we sought to characterize the development of cortical innervation onto the DRN and  
84 its functional consequences in the context of behavioral persistence. In contrast to previous  
85 studies in which adult behavioral readouts were assessed after developmental perturbations  
86 (Bitzenhofer et al., 2021; Soiza-Reilly et al., 2019), we undertook a longitudinal study,  
87 characterizing behavior, synaptic physiology and anatomy, in parallel, from adolescence to  
88 adulthood.

89 The study of cognitive development in mice is challenged by the fact that most tasks designed  
90 to assess cognition require several weeks or even months of training (Pittaras et al., 2020;  
91 Sanchez-Roige et al., 2012; The International Brain Laboratory et al., 2021; Winstanley and  
92 Floresco, 2016). Here, we took advantage of the innate foraging ability to test naive mice in a  
93 two-port probabilistic foraging task which measured their persistence in exploiting a given  
94 foraging port before exploring the other. This task was used previously in adult mice to test their  
95 ability to infer the hidden state of the foraging site, a behavior that took several days to establish  
96 (Vertechi et al., 2020). Here, instead, we took advantage of the fact that even naive mice  
97 performed the task competently, although sub-optimally, from the first day of exposure. We  
98 found that all mice were able to perform the movements required to obtain water within minutes

99 of entering the behavioral box, including nose-poking in the ports, licking at the water spout, and  
100 alternating between ports, suggesting that this task likely taps into a largely innate behavioral  
101 repertoire.

102 We show that the behavior of mice grows more persistent from juvenile (3-4 weeks old) to  
103 adulthood (7-8 weeks), that these behavioral changes mirror the time course of maturation of  
104 the mPFC to DRN projection, and that ablation of this projection in adult mice recapitulates the  
105 juvenile behavioral phenotype. These results suggest that the development of top-down PFC-  
106 DRN afferents is critical to the emergence of cognitive control over behavioral impulsivity that  
107 characterizes adulthood.

## Results

108 ***Cortical top-down input over the dorsal raphe matures in the transition between***  
109 ***adolescence and adulthood in mice.***

110 First, to characterize the development of neocortical projections to the DRN, we focused on the  
111 afferents of layer V neurons, which are the primary origin of these projections (Pollak Dorocic,  
112 2014). Using a mouse line expressing channelrhodopsin-2 (ChR2) in a large fraction neocortical  
113 layer V neurons (Rbp4-Cre/ChR2-loxP) ([Leone et al., 2015](#)), we performed ChR2-assisted  
114 circuit mapping (sCRACM) ([Petreanu et al., 2009](#)) of cortical afferents in brain slices containing  
115 the DRN obtained from mice between postnatal weeks 3 to 12 (Fig 1A). Taking advantage of  
116 the fact that ChR2-expressing axons are excitable even when excised from their parent somata,  
117 we evoked firing of presynaptic ChR2-expressing cortical axons innervating the DRN while  
118 recording the electrophysiological responses of postsynaptic DRN neurons. We assessed the  
119 fraction of recorded DRN neurons receiving cortical excitatory synaptic input (connection

120 probability,  $P_{\text{con}}$ ) and the strength of this connection (amplitude of the evoked synaptic response)  
121 at different developmental time points.  
122 We found a dramatic increase in the connection probability and amplitude of cortico-raphé input  
123 between weeks 3 and 8 (Fig. 1B-C). Between the 3-4 weeks (juvenile mice), the probability of  
124 DRN neurons receiving cortical input was equal to 0.07. This probability increased significantly  
125 to 0.66 ( $P_{\text{con}}$  3-4 weeks vs.  $P_{\text{con}}$  5-6 weeks, Chi-Square test  $\chi^2$  (1, N = 53 neurons) = 24.1,  $p$  =  
126 0.00001) between weeks 5 and 6, reaching a peak connection probability of 0.82 between  
127 weeks 7 and 8 (Fig. 2C). Between 5-6 and 7-8 weeks (i.e. late juvenile to adult mice), the  
128 amplitude of the optogenetically evoked currents increased from  $27.3 \pm 6.2$  pA to  $128 \pm 15.7$  pA  
129 (mean  $\pm$  SEM, two-tailed t-test,  $t(57) = 4.03$ ,  $p = 0.002$ ). To test whether there is a further  
130 development of this pathway in the later stages of development, we recorded slices from 12-  
131 week old mice. We observed no further increase in either the connection probability ( $P_{\text{con}}$  7-8  
132 weeks = 0.82 vs.  $P_{\text{con}}$  5-6 months = 0.80, Chi-Square test  $\chi^2$  (1, N = 70 neurons) = 0.03,  $p = 0.84$ )  
133 or the input magnitude (7-8 weeks old =  $126 \pm 15$  pA vs. 5-6 months old =  $113 \pm 14.1$  pA, two-  
134 tailed t-test,  $t(60) = 1.27$ ,  $p = 0.21$ , Fig. 2B-C). Altogether, these results suggest that the cortico-  
135 raphe pathway gradually matures between weeks 3 and 8 and then plateaus. Importantly, the  
136 location of the recorded DRN neurons was comparable between juvenile and adult mice (Fig.  
137 S1) and thus, the connectivity changes observed across development do not reflect a biased  
138 sampling of differentially innervated sub-regions of the DRN. Furthermore, we observed a  
139 comparable input resistance (3-4 weeks: median = 444 M $\Omega$ , 95% CI = [370, 676], 5-6 weeks:  
140 median = 612 M $\Omega$ , 95% CI = [402, 925], 7-8 weeks: median = 731 M $\Omega$ , 95% CI = [519, 943], 5-6  
141 months: median = 532 M $\Omega$ , 95% CI = [385, 664], Kruskal-Wallis  $H(3) = 6.06$ ,  $p = 0.11$ ) and input  
142 capacitance (3-4 weeks: median = 20.7 pF, 95% CI = [17.4, 25.9], 5-6 weeks: median = 22.8 pF,  
143 95% CI = [15.9, 24.8], 7-8 weeks: median = 20.8 pF, 95% CI = [18.3, 28.5], 5-6 months: median  
144 = 23.5 pF, 95% CI = [14.1, 44.7], Kruskal-Wallis  $H(3) = 0.81$ ,  $p = 0.84$ ) in DRN neurons over  
145 development (Fig. S2A,B), suggesting that changes at the level of the passive propagation of

146 current through DRN neurons is not the underlying cause of the increase in connection  
147 probability and input magnitude observed over time.

148 In these experiments, the onset of ChR2 expression is dictated by the Cre recombinase  
149 expression under the control of the native Rbp4 promoter over development. Therefore, if in the  
150 juvenile cortex there were fewer neurons expressing Rbp4 or the onset of expression was near  
151 our recording time point, this could affect the net amount of ChR2-expressing top-down cortical  
152 axons and/or their net excitability. To control that our findings reflect a development process and  
153 not a genetic artifact caused by the temporal dynamics of Rbp4 expression, we performed two  
154 additional control experiments in one of the main cortical origins of afferents onto the DRN, the  
155 mPFC (Weissbourd et al., 2014, Zhou et al., 2017).

156 First, we compared the density of neurons in the mPFC expressing a fluorescent reporter  
157 (tdTomato) under the control of the Rbp4 promoter in juvenile and adult mice. The same density  
158 of tdTomato expressing somas was detected in the mPFC of juvenile and adult Rbp4-Cre\  
159 tdTomato-loxP mice (Juveniles: median = 4.59 somas per 0.01 mm<sup>2</sup>, 95% CI = [4.59, 6.18], vs.  
160 Adults: median = 5.22 somas per 0.01 mm<sup>2</sup>, 95% CI = [4.35, 6.06], Mann-Whitney U test ( $N_{\text{Juveniles}} =$   
161  $3, N_{\text{Adults}} = 4) = 6, p = 0.99$ , Fig. S2C), indicating that a comparable number of neurons underwent a  
162 Cre-dependent recombination of the tdTomato fluorescent reporter under the control of the  
163 Rbp4 promoter at both developmental time points. Second, we compared the light-evoked  
164 somatic current produced in layer V neurons expressing ChR2 under the Rbp4 promoter in  
165 juvenile and adult mice. In agreement with the previous control, layer V neurons in the mPFC  
166 expressing ChR2 under the Rbp4 promoter produced the same amount of photocurrent upon  
167 light stimulation in juvenile and adult mice (Repeated Measures ANOVA,  $F(1, 11) = 0.138, p =$   
168  $0.71$  for age factor, Fig. S2D). These experiments show that juvenile and adult mice have  
169 similar densities of cortical layer V projection neurons that could give rise to DRN afferents and  
170 that these neurons express similar amounts of ChR2 and thus, if present, projections should be  
171 equally detectable by optogenetic circuit mapping across ages. Altogether, this evidence



172 suggests that the maturation of cortico-raphe projections we report is caused by a  
173 developmental process and is not explained by experimental artifacts.

174 To further understand the mechanisms underlying the cortico-raphe input strengthening  
175 observed over development, we investigated whether the changes of connection probability and  
176 input amplitude we observed were accompanied by differences in the density of cortical axonal  
177 innervation over the DRN. Indeed, we observed a significantly higher density of Rbp4 positive  
178 axons around the DRN in adults compared to juveniles ( $2.2 \pm 0.47$  vs.  $5.7 \pm 0.56$  axons per bin  
179 in juvenile vs. adult mice, two-tailed t-test ( $N_{\text{Juveniles}} = 4$ ,  $N_{\text{Adults}} = 7$ ),  $t(9) = 4.15$ ,  $p = 0.002$ , Fig. 1D-E).

180 This observation supports the idea that the increase in physiological strength we observed  
181 reflects in part the growth of new connections between the neocortex and DRN.

182 To assess whether the development of cortico-raphe projections is specific to raphe projecting  
183 cortical afferents or it reflects a more general maturation of corticofugal projections over  
184 adolescence in mice, we mapped the anatomical and synaptic development of cortico-  
185 accumbens projections, which are mainly originated in the PFC (Phillipson & Griffiths 1985, Li et  
186 al., 2018) and which functional connectivity has been previously assessed in juvenile rodents  
187 (Gorelova and Yang, 1996). In contrast to cortico-raphe afferents, cortico-accumbens  
188 projections did not undergo any significant structural change over the same developmental  
189 period ( $4.5 \pm 0.54$  vs.  $5.8 \pm 0.74$  axons per bin in juvenile vs. adult mice, two-tailed t-test ( $N_{\text{Juveniles}} =$   
190  $3$ ,  $N_{\text{Adults}} = 7$ ),  $t(8) = 1.09$ ,  $p = 0.40$ , Fig. 1D-E). Consistent with the anatomy, the Chr2-assisted  
191 mapping of cortico-accumbens connections in juvenile and adult Rbp4-Chr2 mice revealed no  
192 change in either the connection probability ( $P_{\text{con}}$  3-4 weeks = 0.90 vs.  $P_{\text{con}}$  7-8 weeks = 0.87, Chi-  
193 Square test  $\chi^2(1, N = 19 \text{ neurons}) = 0.03$ ,  $p = 0.81$ ) or the input amplitude in the transition from  
194 juveniles to adults (two-tailed t-test,  $t(15) = 0.15$ ,  $p = 0.88$ , Fig. 1F). Altogether, these  
195 observations reveal the structural and synaptic development of a subpopulation of cortical  
196 afferents targeting the DRN during the transition from juvenile to adult in mice that does not  
197 reflect a generalized development of corticofugal projections.

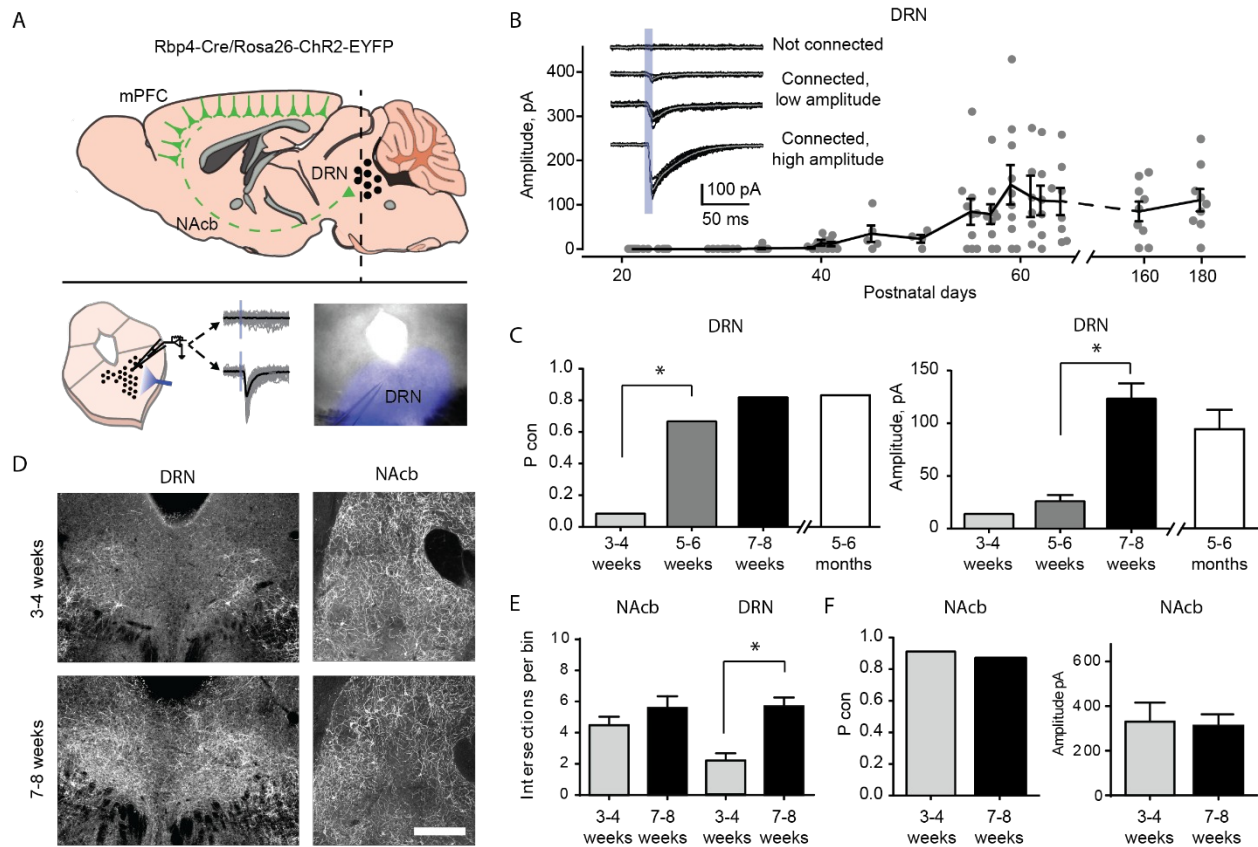

198 **Figure 1. Top-down cortico-raphe connections develop over adolescence in mice.** (A)  
 199 Schematic representation of a sagittal view of an Rbp4-ChR2 mouse brain illustrating top-down cortico-  
 200 raphe afferents. Coronal slices containing the DRN were obtained ex vivo, and whole-cell recordings of  
 201 DRN neurons were performed to assess cortical connectivity upon light stimulation. (B) Optogenetically  
 202 evoked EPSCs were recorded in DRN neurons contacted by ChR2 expressing cortical axons (122  
 203 neurons, 20 Rbp4-ChR2 mice). The current amplitude of cortico-raphe connections is plotted as a  
 204 function of postnatal age in mice. (C) Pooled connection probability (Connected cells/ total cells) and  
 205 averaged connection amplitude of cortico-DRN afferents at four different developmental points: early  
 206 juvenile (3-4 weeks), late juvenile (5-6 weeks), early adult (7-8 weeks), late adult (5-6 months). (D)  
 207 Example images illustrate an increased cortico-DRN innervation in adult mice compared to juveniles,  
 208 while the cortico-accumbens innervation remains constant over the same time period. Scale bar = 400  
 209 microns. (E) Number of axonal intersections quantified in the DRN and nucleus accumbens of juvenile

210 and adult mice. (F) Pooled connection probability and averaged connection amplitude of cortico-  
211 accumbens afferents in early juvenile and early adult mice. \* indicates  $p < 0.05$ .

212 ***Baseline persistence correlates with the maturation of cortico-raphe input in the***  
213 ***transition between adolescence and adulthood in mice.***

214 To investigate the development of behavioral persistence in mice, we employed a previously  
215 published self-paced foraging task (Vertechi et al., 2020). The setup consists of a box with two  
216 nose-ports separated by a barrier (Fig. 2A). Each nose-port constitutes a foraging site that mice  
217 can actively probe in order to receive water rewards. Only one foraging site is active at a time,  
218 delivering reward with a certain probability ( $P_{\text{rwd}} = 90\%$ ) when probed. Each try in the active  
219 site can also cause a switch of the active site's location with a certain probability ( $P_{\text{sw}} = 90\%$ )  
220 (Fig. 2B). After a state switch, mice have to travel to the other port to obtain more reward,  
221 bearing a time cost to travel. While this task was previously studied after multiple days of  
222 training, after which adult mice use an inference-based strategy, early in learning, they show a  
223 value-based strategy, staying longer when they receive more rewards (Vertechi et al., 2020).  
224 This behavior was useful for the purpose of assessing cognitive development, as it requires  
225 persistence in poking at the port despite reward failures.

226 To measure how developmental changes affect mice's persistence, we compared the behavior  
227 of juvenile (weeks 3-4) and adult mice (weeks 7-8) on their first exposure to the apparatus and  
228 task. Presumably due to the novelty of the apparatus, mice tended to interleave poking in the  
229 port with investigating the apparatus, often taking long pauses in between pokes at the same  
230 port. This resulted in a less regular poking structure than experienced mice (Fig. 2B). However,  
231 both adults and juveniles succeeded in performing the required actions of poking and traveling  
232 between ports, receiving substantial rewards over the course of the session and there were no  
233 gross differences in the behavior of juvenile and adult mice (Fig. 2B).

234 In order to compare behavioral persistence across development we first assessed the animals'  
235 leaving time, measured as the overall time spent investigating one port before visiting the other  
236 (time elapsed from the first to the last poke in a port, as illustrated in Fig. 2B). There was no  
237 difference in the mean or median leaving time for juveniles vs. adults. However, inspection of  
238 the distributions of leaving times showed an extremely heavy tail of long 'site visits' (Fig. 2C)  
239 Assuming that very long leaving times reflect not continued foraging episodes but behavioral  
240 'lapses' due to exploration or other distractions, we applied an arbitrary cutoff of 60s to both  
241 distributions and compared the medians of the resulting truncated distributions. The comparison  
242 revealed that juveniles had significantly shorter median leaving times (Adults: median = 0.96,  
243 95% CI = [0.05, 0.06], Juveniles: median = 0.78, 95% CI = [0.15, 0.06]; Mann Whitney U test (N  
244 Adults = 21, N Juveniles = 23) = 366,  $p = 0.0029$ , effect size = 0.76), indicative of reduced  
245 persistence. This could also be seen in a comparison of cumulative distributions (Fig. 2D),  
246 which shows a leftward shift in juveniles for trials around 1-10 s, a time scale which is the typical  
247 duration of trained animals' trials.

248 To formalise this analysis without the use of arbitrary cutoffs, we performed a logistic regression  
249 for probability of leaving the patch as a function of the Time within the trial, the Age of animal  
250 (juvenile vs. adult) and elapsed trials within the session (Trial):

251  $\text{Leave} \sim 1 + \text{PokeTime} + \text{Trial} + \text{Age} + \text{PokeTime} \& \text{Age} + \text{Trial} \& \text{Age} + (1 + \text{PokeTime} + \text{Trial} | \text{Mouse})$  .

252 The individual variability was accounted for through generalized linear mixed models with  
253 random intercept and slopes for each mouse (see methods for the implementation). A factor  
254 was considered to significantly affect the decision to leave if the value of its estimated coefficient  
255 plus 95% confidence interval (1000 parametric bootstrap analysis, see methods) did not cross  
256 0. This analysis showed a significant effect of Age, with juveniles more likely to leave than  
257 adults (Fig. 2E). We confirmed that the animals' Age group significantly contributes to the ability

258 to explain the probability of leaving (likelihood ratio test on  
259  $\text{Leave} \sim 1 + \text{PokeTime} + \text{Trial} + \text{Age} + \text{PokeTime} \& \text{Age} + \text{Trial} \& \text{Age} + (1 + \text{PokeTime} + \text{Trial} | \text{MouseID})$   
260 versus  $\text{Leave} \sim 1 + \text{PokeTime} + \text{Trial} + (1 + \text{PokeTime} + \text{Trial} | \text{MouseID})$ :  $X^2_{(3)} = 19.27$ ,  $p = 2e^{-4}$ ). The  
261 probability of leaving increased as a function of Trial, indicating that animals become less  
262 persistent over the course of the session (Fig. S3A). Including the Trial factor also improved the  
263 model prediction (likelihood ratio test on  
264  $\text{Leave} \sim 1 + \text{PokeTime} + \text{Trial} + \text{Age} + \text{PokeTime} \& \text{Age} + \text{Trial} \& \text{Age} + (1 + \text{PokeTime} + \text{Trial} | \text{MouseID})$   
265 versus  $\text{Leave} \sim 1 + \text{PokeTime} + \text{Age} + \text{PokeTime} \& \text{Age} + (1 + \text{PokeTime} | \text{MouseID})$ :  $X^2_{(5)} = 128.21$ ,  $p <$   
266  $1e^{-25}$ ). This effect could suggest a drop in motivation due to the water drunk during the session.  
267 However there was no significant interaction between Trial and Age factors, indicating that  
268 differences in satiety, fatigue or learning accumulated throughout the session do not underlie  
269 the change in persistence between juveniles and adults.

270 The use of leaving time as a measure of persistence does not take into account the nature of  
271 the behavior before leaving. A difference in persistence could also manifest as differences in the  
272 fraction of time spent actively poking. Indeed, adults make more pokes per trial than did  
273 juveniles (Fig. 2F; Mann-Whitney U test (N Adults = 21, N Juveniles = 23) = 354.5,  $p = 0.008$ ,  
274 effect size = 0.73). Next, to assess port occupancy, we quantified the cumulative time spent  
275 with the snout in the port divided by the overall time elapsed from the trial beginning (Fig. 2G).  
276 This analysis also showed a clear difference between juvenile and adult mice, with adults' port  
277 occupancy extending long into the trial. Consistent with the leaving time regression results, port  
278 occupancy decreased with time into a trial. and juveniles' poke occupancy decreased  
279 significantly faster than the adults', as indicated by both a significant effect of the Age variable  
280 (Fig. 2H) and significant improvement in regression with the Age factor: likelihood ratio test on  
281  $\text{Occupancy} \sim 1 + \text{PokeTime} + \text{Age} + \text{Age} \& \text{PokeTime} + (1 + \text{PokeTime} | \text{MouseID})$  vs  
282  $\text{Occupancy} \sim 1 + \text{PokeTime} + (1 + \text{PokeTime} | \text{MouseID})$ ,  $X^2_{(2)} = 20.10$ ,  $p < 1e^{-4}$ ).

283 These results indicate a difference in persistence of foraging behavior in juvenile vs. adult mice.  
284 We also found that the difference in behaviour between juveniles and adults had an impact on  
285 performance. Compared to adults, juveniles performed a larger proportion of incorrect trials, i.e.  
286 leaving before the reward side had switched (Fig. 2F; Adults: median = 24% incorrect, 95% CI =  
287 [24%, 31%], Juveniles: median = 36% incorrect, 95% CI = [28%, 55%]; Mann-Whitney U test (N  
288 Adults = 21, N Juveniles = 23) = 137.5,  $p = 0.015$ , effect size = 0.72). This would presumably  
289 result in a reduction in foraging efficiency, but, since both juvenile and adult naive animals'  
290 exhibited substantial periods of non-foraging exploratory behavior, we did not attempt to further  
291 quantify this.

292 Finally, to assess whether the developmental changes are consistent in male and female mice  
293 we tested the variable sex in the analysis of the previous cohort of mice. We found no significant  
294 effect of Sex on the probability of leaving either alone or in interaction with animals' age (Fig.  
295 S3C), and including Sex as a predictor had no significant improvement in the model's ability to  
296 explain the decision to leave (Fig. S3D, likelihood ratio test on  
297  $\text{Leave} \sim 1 + \text{PokeTime} + \text{Trial} + \text{Age} + \text{Sex} + \text{Age} \& \text{Sex} + (1 + \text{PokeTime} + \text{Trial} | \text{MouseID})$  versus  
298  $\text{Leave} \sim 1 + \text{PokeTime} + \text{Trial} + \text{Age} + (1 + \text{PokeTime} + \text{Trial} | \text{MouseID})$ :  $X^2_{(2)} = 3.46$ ,  $p = 0.18$ ). These  
299 results suggest that the maturation of persistence occurs at a similar rate in male and female  
300 mice.

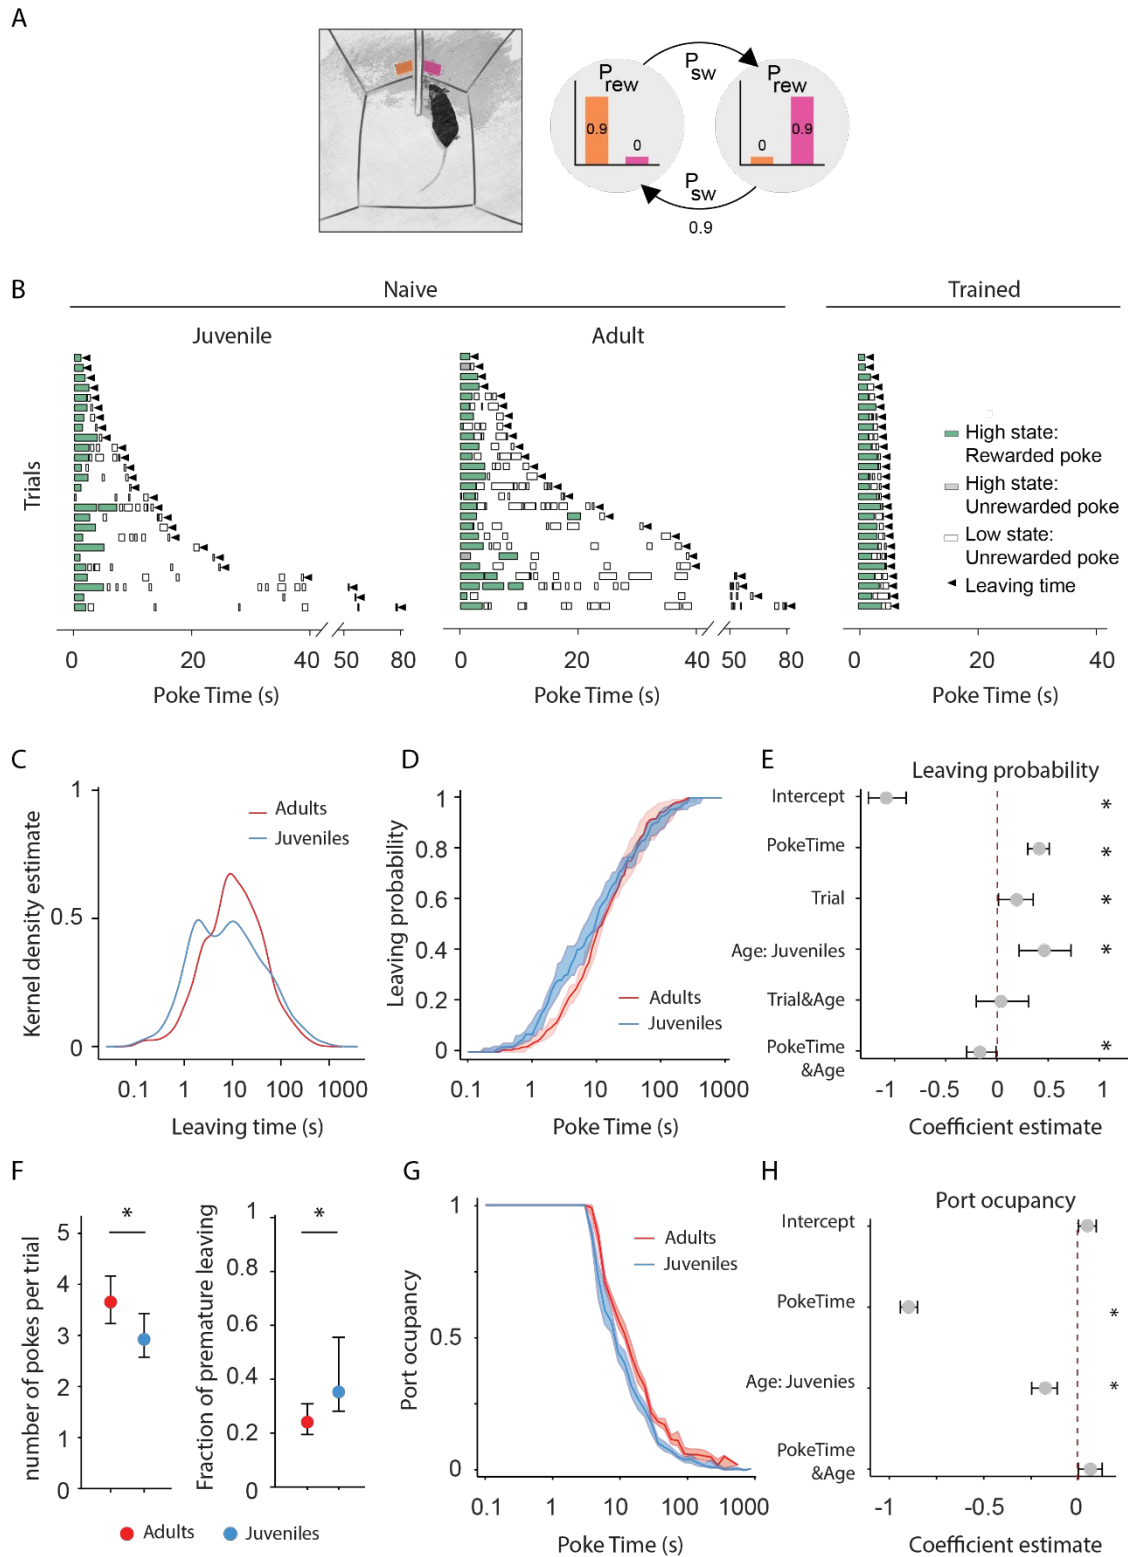

301 **Figure 2. Adult mice persist longer than juveniles in exploiting a foraging patch**

302 (A) Illustration of the rodent foraging task. Water-deprived mice seek rewards by probing two nose-ports.  
303 (B) Randomly selected examples of poking behavior throughout a naive juvenile, naive adult and trained  
304 adult behavioral session sorted by trial length. Pokes in the active state can be rewarded (in green) or not  
305 (in gray). Pokes in the inactive state are never rewarded (in white). After the state switches, the mice have  
306 to travel to the other side (left or right port, L and R) to obtain more water. Leaving time is illustrated with  
307 black triangles. (C) Distribution of the trial durations for naive juveniles and naive adults. (D). Cumulative  
308 distribution of the probability of leaving (median  $\pm$  95% CI across mice) as time elapses from the first poke  
309 in a trial for adults and juvenile animals. (E) Regression coefficients  $\pm$  95% CI resulting from a parametric  
310 bootstrap (n = 1000) of a mixed models logistic regression to explain the probability of leaving. \* indicates  
311 predictors with a significant impact on the probability of leaving. (F) Median  $\pm$  95% CI fraction of the  
312 number of pokes per trial (left) and incorrect trials (right). Juvenile mice do a significantly lower amount of  
313 pokes per trial and a higher proportion of premature leaving. (G) Port occupancy as a function of trial time  
314 elapsed for juveniles and adults. (H) Regression coefficients  $\pm$  95% CI resulting from a parametric  
315 bootstrap (n = 1000) of a mixed models logistic regression to explain the port occupancy, as in F. All  
316 analyses in C-H computed by pooling the data from all sessions of juvenile (N = 21) or adult (N = 23)  
317 mice, yielding a total of 2875 trials (juveniles = 1347, adults = 1528) and 9596 pokes (juveniles = 3908,  
318 adults = 5688).

319 ***mPFC-DRN pathway ablation in adult mice recapitulates juvenile behavioral***  
320 ***features.***

321 The above results establish a correlation between the development of the descending cortical  
322 input to the DRN and the emergence of behavioral persistence. To more directly causally link  
323 the development of cortico-raphé afferents to the increase in persistence observed in the  
324 probabilistic foraging task, we next ablated the cortico-raphé pathway in adult mice and  
325 assessed the impact on behavioral persistence.



326 To ablate cortico-raphe afferents, we used an engineered version of Caspase3 (taCasp3-TEVp)  
327 that is able to trigger apoptosis bypassing cellular regulation upon activation by the TEV  
328 protease, which is coexpressed in the same construct (Yang et al., 2013). We packaged a Cre  
329 dependent taCasp3-TEVp construct (or the reporter tdTomato as a control) in a retrogradely  
330 travelling AAV vector (rAAV), that we locally delivered in the DRN of Rbp4-Cre mice. This  
331 approach resulted in the fluorescent tagging of cortico-raphe layer V projecting neurons in  
332 control mice (tdTomato mice) and in the ablation of the same corticofugal pathway in taCasp3-  
333 TEVp injected mice (Caspase mice) (Fig. 3A).

334 The prelimbic/infralimbic (PL/IL) and anterior cingulate (AC) cortices, which constitute the  
335 mPFC, were the areas with the highest density of DRN-projecting tdTomato+ somas in control  
336 animals and consistently more extensive neuron density loss in caspase injected mice,  
337 quantified using the pan-neuronal marker NeuN (Fig. 3A-C, Fig. S4, control vs. caspase, two-  
338 sample Kolmogorov-Smirnoff Test = 0.028,  $p = 0.002$  for PL/IL and  $D = 0.024$ ,  $p = 0.01$  for AC).  
339 We also found tdTomato+ somata in the medial orbitofrontal cortex (MO) of the control group;  
340 however, this projection was weaker in terms of tdTomato+ labelled neurons and, consistently,  
341 the difference in layer V NeuN densities between control and caspase mice was not significant  
342 (Figs. 3C, S4,  $D = 0.017$ ,  $p = 0.08$ ).

343 Apart from the mPFC, sparse labeling of tdTom+ neurons was found in more posterior levels of  
344 the neocortex, namely in the retrosplenial cortex (RS) and in the temporal association cortex  
345 (TeA) (Fig. S4). Nonetheless, tdTom+ neurons in the RS and TeA were found in only 5 and 3  
346 out of 8 control animals, respectively. Consistently, the reduction in NeuN layer V neuronal  
347 density in these two areas was minimal and non-significant compared to controls (Fig. 3C,  $D =$   
348  $0.034$ ,  $p = 0.12$  for RS and  $D = 0.025$ ,  $p = 0.19$  for TeA). In addition, no differences in NeuN  
349 density were observed between caspase injected animals and controls in a control area not  
350 showing tdTomato expressing somas and therefore not projecting to the DRN (M1, Fig. 3C,  $D =$

351 0.019,  $p = 0.15$ ). These observations suggest that our ablation approach significantly affected  
352 mPFC-DRN projecting neurons, particularly from PL/IL and AC cortices.

353 When investigating the distribution of tdTomato expressing somas, we observed weak collateral  
354 projections of the cortical subpopulation projecting to the DRN in the lateral septum, lateral  
355 hypothalamic nucleus, the ventral tegmental area and the anterior periaqueductal gray; medium  
356 collateral axonal density in anterior subcortical olfactory nuclei (anterior dorsal endopiriform,  
357 anterior olfactory nucleus, dorsal taenia tecta and islands of Calleja) and the substantia nigra;  
358 and heavy collateralization in the dorsomedial striatum (Fig. S5).

359 We then assessed the impact of ablation of the mPFC-DRN projection on behavioral  
360 persistence using the foraging paradigm. We observed a similar pattern of differences between  
361 caspase and tdTomato mice as between juveniles and adults (Fig. 3D-F). Caspase animals  
362 showed an increase in the probability of leaving the port, seen as a leftward shift in the  
363 cumulative distribution of leaving times (Fig. 3G). We applied logistic regression analysis to  
364 identify which factors significantly affect the probability of leaving after each poke. Both  
365 PokeTime and Trial significantly influenced the probability of leaving (Fig. 3H). Crucially, we  
366 found that animals lacking cortico-raphé projections are significantly more likely to leave the  
367 patch earlier than control animals (Fig. 3H). As for the comparison of juvenile and adult mice,  
368 this effect did not interact with PokeTime (Fig. 3H). Including the Virus group factor significantly  
369 improved the explanatory power of the model (likelihood ratio test on  
370  $\text{Leave} \sim 1 + \text{PokeTime} + \text{Trial} + \text{Virus} + \text{PokeTime} \& \text{Virus} + \text{Trial} \& \text{Virus} + (1 + \text{PokeTime} + \text{Trial} | \text{MouseID})$   
371 versus  $\text{Leave} \sim 1 + \text{PokeTime} + \text{Trial} + (1 + \text{PokeTime} + \text{Trial} | \text{MouseID})$ :  $X^2_{(3)} = 10.84$ ,  $p = 0.012$ ).  
372 Interestingly the reduced persistence of Caspase animals does not scale with the elapsed time  
373 as for the juveniles (lack of interaction effect  $\text{PokeTime} \& \text{Virus}$ , Fig. 3H).

374 We also characterized differences in poking behavior. As with juvenile vs. adult mice, caspase  
375 mice made significantly fewer pokes per trial than adults (Fig. 3F; Mann-Whitney U test (N  
376 Caspase = 7, N tdTomato = 8) = 49,  $p = 0.01$ , effect size = 0.82) and showed a shift toward  
377 shorter port occupancy (Fig. 3I). A regression analysis showed that the viral intervention  
378 impacted significantly poke occupancy (likelihood ratio test on  
379  $\text{Occupancy} \sim 1 + \text{PokeTime} + \text{Virus} + \text{Virus} \& \text{PokeTime} + (1 + \text{PokeTime} | \text{MouseID})$  vs  
380  $\text{Occupancy} \sim 1 + \text{PokeTime} + (1 + \text{PokeTime} | \text{MouseID})$ ,  $X^2(2) = 12.69$ ,  $p = 0.018$ ), the regression  
381 analysis showed that this was mainly due to a progressive reduction during the trial rather than  
382 a subtractive effect (significant PokeTime & Virus: Caspase, not Virus: Caspase alone, Fig. 3J).

383 Finally, we assessed whether ablating the prefrontal-DRN pathway changed the performance  
384 on the task. Compared to tdTomato mice, caspase mice committed a significantly larger  
385 proportion of errors, prematurely leaving the site before the active port switches (Fig. 3F;  
386 tdTomato: median = 22% incorrect, 95% CI = [16%, 33%], caspase: median = 50% incorrect,  
387 95% CI = [32%, 57%]; Mann Whitney U test ( $N_{\text{tdTomato}} = 8$ ,  $N_{\text{Caspase}} = 7$ ) = 137.5,  $p = 0.01$ ).

388 Together these results indicate that ablating the mPFC-DRN pathway recapitulates the key  
389 behavioral features characteristic of juvenile mice in the same foraging task, indicating that the  
390 mature mPFC-DRN projection is necessary for the behavioral persistence displayed by adult  
391 mice and suggesting that this pathway is likely to contribute to the development of behavioral  
392 persistence in mice.

393 **Figure 3. Animals lacking cortico-raphe projections show less behavioral**  
394 **persistence in exploiting a foraging patch**

395 (A) Schematic representation of the ablation strategy used for behavioral assessment. Retrogradely  
396 transporting AAV vectors expressing either the fluorescent reporter tdTomato (rAAV-tdTomato) or the

397 intrinsically active apoptosis triggering Caspase3 (rAAV-Caspase, Caspase group were locally delivered  
398 in the DRN of Rbp4-Cre mice. In the cortical areas containing tdTomato expressing neurons in control  
399 animals (in example picture, PL/IL cortex) the density of neurons was quantified with an  
400 immunohistochemistry protocol against the pan-neuronal marker NeuN and compared to the neuronal  
401 densities obtained in the same cortical areas of ablated mice (scale bar = 200 microns). (B) Distribution of  
402 the neuronal density difference between ablated mice and the mean density of control mice per cortical  
403 depth bin in the PL/IL cortex (black shaded error plot). The neuronal density loss observed in ablated  
404 mice when compared to control NeuN densities matches the cortical depth in which tdTomato neurons  
405 are located (red shaded area). Shaded error plots represent mean  $\pm$  SEM. (C) Summary of caspase-  
406 control NeuN density per brain area (MO: median = -0.46, 95% CI = [-2.81, 1.06], PL/IL: median = -2.3,  
407 95% CI = [-4.01, -1.44], AC: median = -2.26, 95% CI = [-3.59, -0.17], Rs: median = 0.75, 95% CI = [-1.80,  
408 1.81], TeA: median = -0.63, 95% CI = [-1.01, 1.76], and M1: median = 0.14, 95% CI = [-1.81, 0.73]). (D)  
409 Randomly selected examples of poking behavior for a tdTomato and caspase behavioral session sorted  
410 by trial length. Pokes in the active state can be rewarded (in green) or not (in gray). Pokes in the inactive  
411 state are never rewarded (in white). Leaving time is illustrated with black triangles. (E) Distribution of the  
412 trial durations for tdTomato and caspase mice. (F) Median  $\pm$  95% CI fraction of the number of pokes per  
413 trial (left) and incorrect trials (right). Caspase mice do a significantly lower amount of pokes per trial and a  
414 higher proportion of premature leaving. (G) Cumulative distribution of the probability of leaving as a  
415 function of trial time elapsed (median  $\pm$  95% CI across mice) for tdTomato and Caspase animals. (H)  
416 Regression coefficients  $\pm$  95% CI resulting from a parametric bootstrap (n = 1000) of a mixed models  
417 logistic regression to explain the probability of leaving. (I) Port occupancy as a function of trial time  
418 elapsed for tdTomato and Caspase. (J) Regression coefficients  $\pm$  95% CI resulting from a parametric  
419 bootstrap (n = 1000) of a mixed models logistic regression to explain the port occupancy. All analyses in  
420 B-G computed by pooling the data from the histology and the first session of Caspase (N = 7) or  
421 tdTomato (N = 8) mice, yielding a total of 1464 trials (Caspase = 939, tdTomato = 525) and 4742 pokes  
422 (Caspase = 2555, tdTomato = 2187).

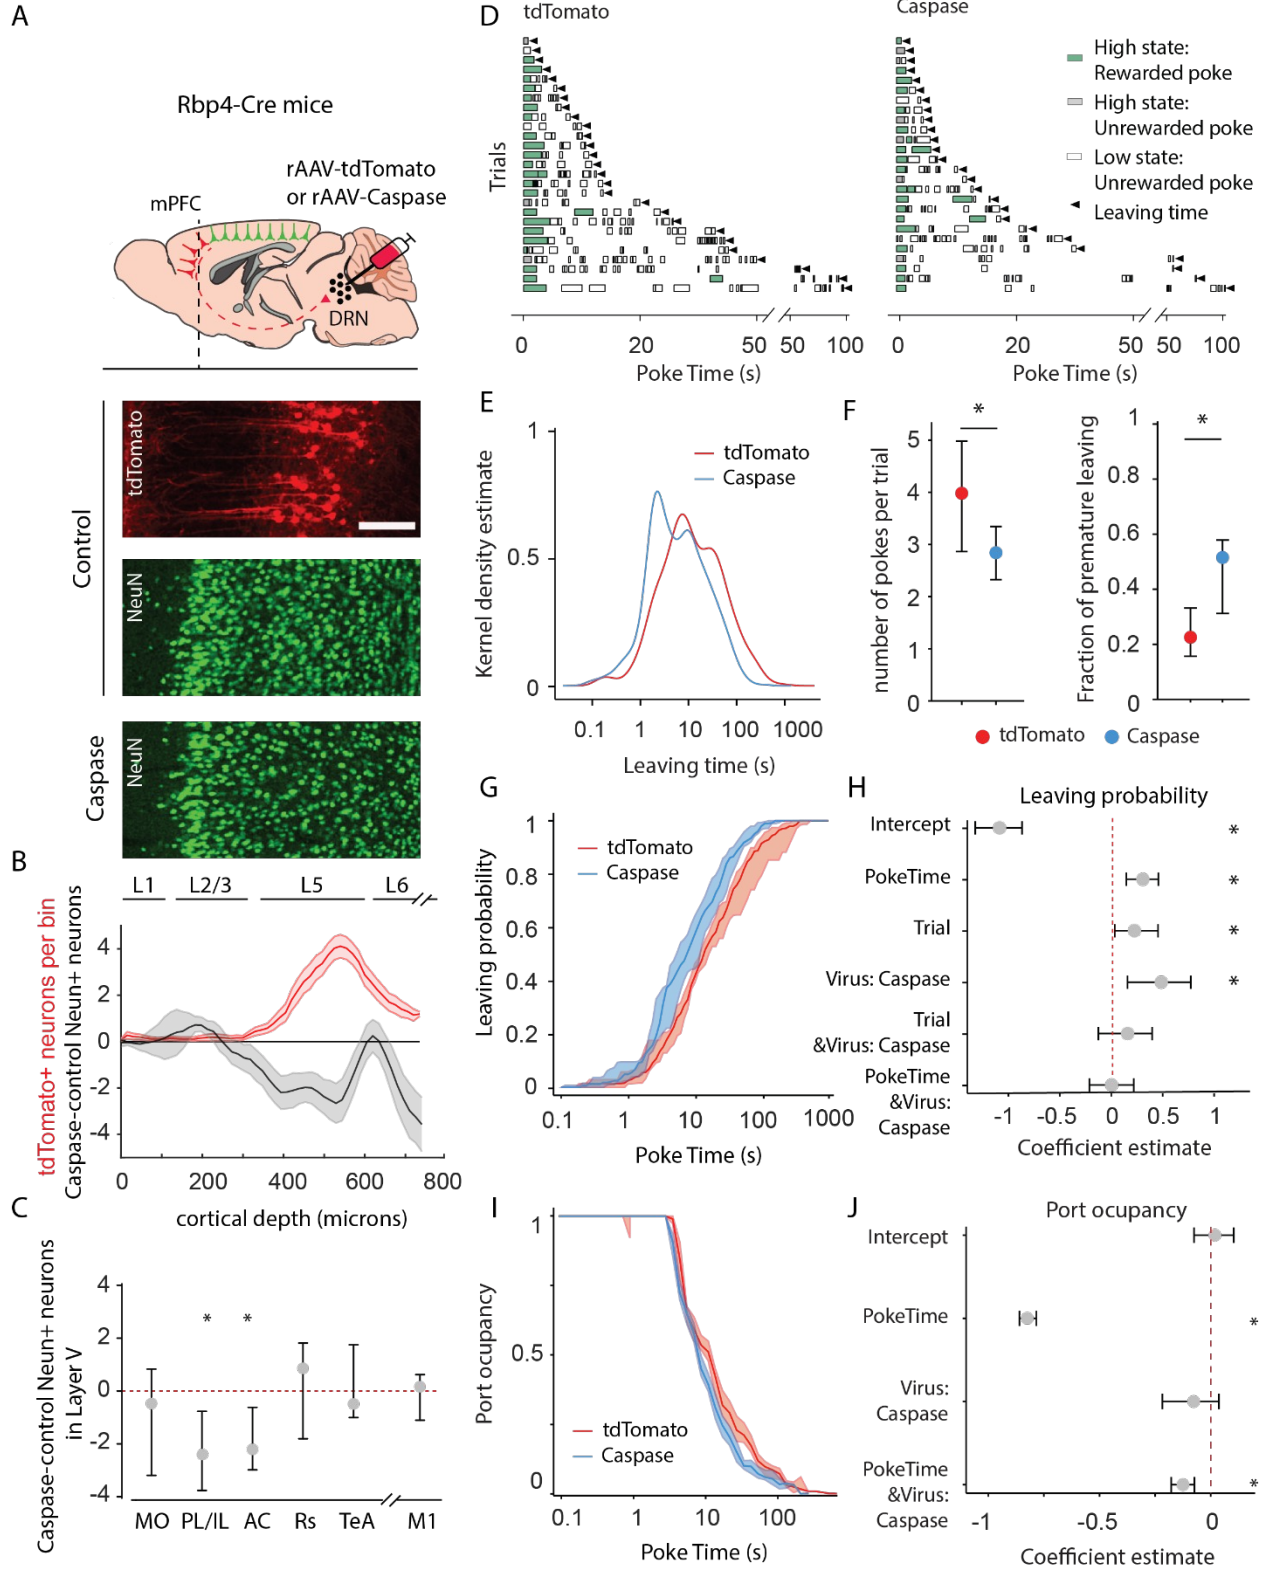

## Discussion

423 In the present study, we described how the postnatal maturation of the mPFC projection to the  
424 DRN during adolescence is linked to the performance of a probabilistic foraging task. Over the  
425 same period of development, the mPFC to DRN projection underwent a dramatic increase in  
426 potency and mice developed an increase in persistence in foraging behavior. Ablation of the  
427 mPFC-DRN pathway in adult mice recapitulated the features observed in the behavior of  
428 juvenile mice, supporting a causal relationship between the mPFC-DRN projection and  
429 behavioral persistence.

430 In a wide variety of species, including mice, adolescence corresponds to the emancipation from  
431 the parents (Spear, 2000), a period in which individuals need to develop or refine skills to  
432 become independent. This ethological scenario may explain the evolutionary selection of  
433 juvenile behavioral traits (Sercombe, 2014; Spear, 2000), such as increased impulsivity or high  
434 risk taking behavior (Laviola et al., 2003; Sercombe et al., 2014). However, the abnormal  
435 development of cognitive control over the intrinsic behavioral tendencies of juveniles may  
436 underlie aspects of the etiopathology of impulsive and addictive disorders in adult humans  
437 (Reiter et al., 2016, Wong et al., 2006). In line with pre-adolescent humans' lack of delay  
438 gratification ability (Mischel et al., 1989), and with studies assessing impulsive behavior in mice  
439 over development (Sasamori et al., 2018), we found that mice of 3-4 weeks of age tend to be  
440 less persistent than 7-8 weeks old mice in a probabilistic foraging task. This led to a negative  
441 impact on foraging efficiency, with more premature site-leaving decisions.

442 From a neural perspective, maturational changes of prefrontal cortical areas, including the  
443 mPFC, have been previously linked to the emergence of cognitive skills during development in  
444 primates and humans (Luna et al., 2015, Nagy et al., 2004, Velenova et al., 2008). Such  
445 changes result in an increased top-down behavioral control and increased functional

446 connectivity with cortical and subcortical targets (Hwang et al., 2010) in the transition between  
447 childhood to adulthood. However, the specific contribution of long-range top-down mPFC  
448 circuits and the cellular mechanisms underlying its development had not been previously  
449 investigated.

450 Here, using optogenetic-assisted circuit mapping we characterized the structural and functional  
451 development of cortico-raphé projections that take place over adolescence in mice. A recent  
452 report showed that a subpopulation of DRN-projecting mPFC neurons increases their axonal  
453 contacts over the DRN in an earlier phase of postnatal development (weeks 1-2) (Soiza-Reilly et  
454 al., 2019). We found a mPFC-DRN connection strength at 5-6 weeks postnatal similar to that  
455 reported by Soiza-Reilly and colleagues at a similar developmental time point (4-5 weeks of  
456 age). In addition, we found a connection strength at 7-8 weeks of age similar to those reported  
457 in adult rodents elsewhere (Zhou et al., 2017, Geddes et al., 2016). Thus, our findings are  
458 consistent with previous observations in the literature and suggest that the maturation of mPFC-  
459 DRN afferents starts early in postnatal development and undergoes an extended development  
460 period, plateauing only after reaching 7-8 weeks of age. Among the previous studies  
461 investigating the postnatal development of top-down afferents from the mPFC in rodents (Klune  
462 et al., 2021, Peixoto et al., 2016, Ferguson & Gao 2015), the latest mPFC afferent maturational  
463 process reported, the mPFC innervation over the basolateral amygdala, occurs up to week 4  
464 (Arruda-Carvalho et al., 2017). Thus, to our knowledge, the mPFC-DRN pathway represents  
465 the latest top-down pathway from the cortex to develop.

466 Importantly, we found that the structural development of mPFC-DRN projections is causally  
467 linked to the maturation of behavioral persistence in adult mice. Using a genetically driven  
468 ablation approach (Yang et al., 2013), we selectively eliminated layer V cortical neurons  
469 projecting to DRN in adult mice. The procedure resulted in a behavioral phenotype that  
470 replicated key features of the juvenile foraging behavior. We observed a reduction in behavioral

471 persistence, coupled with an increased fraction of errors. Furthermore, we localized the origin of  
472 these projections and quantified the local neuronal loss. The PL, IL, and AC cortices, areas that  
473 comprise the so called mPFC (Klune et al., 2021), suffered a significant loss with the procedure,  
474 highlighting their importance for displaying behavioral persistence necessary for reward  
475 exploitation in a foraging task.

476 Previous reports have shown that the pharmacological inactivation of the IL cortex reduces  
477 response persistence in a foraging task (Verharen et al., 2020). Moreover, lesions of the IL  
478 cortex improves performance on a reversal learning task (Ashwell and Ito, 2014), which  
479 resembles the increased behavioral flexibility observed in juvenile mice (Johnson and Wilbrecht,  
480 2011). In addition, neurons in the PL cortex have been shown to track reward value and reflect  
481 impulsive choices (Sackett et al., 2017). More generally, the inactivation of PL/IL cortices using  
482 optogenetics leads to an increase in premature responses in a probabilistic reversal task  
483 (Nakayama et al., 2018), while the optogenetic activation of the PL/IL cortices increases food-  
484 seeking behavior while reducing impulsive actions (Warthen et al., 2016).

485 Furthermore, lesions in the AC impair behavioral inhibition producing an increase in premature  
486 actions in rodents (Muir et al., 1996, Hvoslef-Eide et al., 2018). More recently, it has been  
487 shown that the control of impulsive actions exerted by the AC requires intact signalling through  
488 Gi-protein in its layer-5 pyramidal neurons (Van der Veen et al., 2021). Altogether, there is  
489 considerable evidence linking the activity of the areas composing the mPFC (PL, IL and AC  
490 cortices) to the control of impulsive actions.

491 In addition, the optogenetic activation of DRN 5HT neurons, a major subcortical target of mPFC  
492 projections (Geddes et al., 2016; Zhou et al., 2017; Weissbourd et al., 2014, Pollak Dorocic et  
493 al., 2014), improves the performance of a delayed response task (Miyazaki et al., 2014, 2018;  
494 Fonseca et al., 2015) through an increase in active behavioral persistence (Lottem et al., 2018),



495 which is the converse effect of the pharmacological silencing of the mPFC (Narayan and  
496 Laubach, 2006; Narayan et al., 2013; Murakami et al., 2017). Altogether, the emerging picture  
497 suggests that the individual activation of either mPFC or DRN converges into a behaviorally  
498 persistent phenotype. Consistent with this, the activation of mPFC-DRN top-down projections  
499 also has been shown to increase active persistence (Warden et al., 2012). However, previous  
500 studies have reported a net inhibitory effect of mPFC input onto 5-HT neurons in the DRN  
501 (Celada et al., 2001; Maier, 2015), particularly after prolonged trains of high-frequency  
502 stimulation (Srejic et al., 2015). This raises a question on the directionality with which mPFC  
503 input modulates DRN neuronal activity in the context of behavioral control. One possible  
504 mechanism would be a frequency dependency of the net effect, as found in thalamocortical  
505 connections (Crandall et al., 2015). In this scenario, given that the inhibitory interneurons in the  
506 DRN can track faster frequencies than 5-HT neurons (Jin et al., 2015) and that 5-HT neurons  
507 undergo 5-HT<sub>1a</sub> autoreceptor mediated inhibition upon dendritic NMDA receptor activation (De  
508 Kock et al., 2006), a prolonged activation of mPFC afferents to the DRN may, in turn, produce  
509 inhibition of 5-HT neurons. Nevertheless, other, less explored, patterns of cortical activity in  
510 different frequency ranges may tune 5-HT neuron subpopulations in different ways under more  
511 naturalistic patterns of activation and could be the focus of future research. An alternative  
512 mechanism for the bidirectional control of DRN activity by mPFC input would be synaptic  
513 plasticity, since it has been shown that activity dependent plasticity (Challis and Berton, 2015)  
514 and neuromodulators (Geddes et al., 2016) can bias the net excitatory or inhibitory effect that  
515 mPFC input exerts on DRN 5HT neurons.

516 In addition, while it's well described that the PL/IL cortices produce a dense innervation over the  
517 DRN, the adjacent PR and IL cortices exert opposite effects on fear conditioning (Giustino &  
518 Maren, 2015) as well as on avoidance behaviors and behavioral inhibition (Capuzzo et al.,  
519 2020). This striking contraposition in their functional role leaves open the possibility of different

520 circuit motifs on their DRN innervation that could explain a putative excitatory or inhibitory effect  
521 and that should also be the focus of future research.

522 The cortical subpopulation of DRN-projecting neurons manipulated in adult Rbp4-Cre mice in  
523 this study presented collateral projections that were particularly dense onto the dorsomedial  
524 striatum (Fig. S5), a pathway that has been shown relevant for foraging decisions (Bari et al.,  
525 2019). While it has been shown that the cortico-striatal pathway is fully developed after P14  
526 using Rbp4-Cre mice (Peixoto et al., 2016) and therefore unlikely to underlie the developmental  
527 differences observed in this study, we cannot rule out an impact of the ablation of corticostriatal  
528 collaterals in the behavioral persistence decrease observed in Caspase treated mice.

529 The presence of parallel sub-systems in the DRN, with complementary projections either to the  
530 prefrontal cortex or to the amygdala and responsible for different behavioral responses has  
531 recently been reported (Ren et al., 2018). In our hands, mPFC-DRN descending neurons had  
532 very sparse collateralization to the amygdala (Fig. S5), while collaterals to the dorsal striatum or  
533 substantia nigra were abundant. This may suggest the presence of loops of preferential  
534 interconnectivity (mPFC→DRN/DRN→mPFC and mPFC→Amygdala/Amygdala→mPFC) as it  
535 has been shown for other cortical-subcortical loops (Young et al., 2021, Li et al., 2020), with  
536 different DRN subpopulations exerting specific neuromodulatory effects in either region (Ren et  
537 al., 2018).

538 To summarize, our results describe a process of late postnatal development of top-down mPFC  
539 afferents onto DRN causally linked to the emergence of behavioral persistence in the transition  
540 between adolescence and adulthood. This critical period of corticofugal axonal development  
541 may also represent a period of vulnerability for maladaptive development involved in the  
542 etiopathogenesis of psychiatric disorders (Rutter, 2007; Chen et al., 2019; Soiza-Reilly et al.,  
543 2019; Guirado et al., 2020).

## Methods

### 544 ***Animals***

545 All experimental procedures were approved and performed in accordance with the  
546 Champalimaud Centre for the Unknown Ethics Committee guidelines and by the Portuguese  
547 Veterinary General Board (Direcção-Geral de Veterinária, approval 0421/000/000/2016). The  
548 mouse lines used in this study were obtained from the Mutant Mouse Resource and Research  
549 Center (MMRRC), Rbp4-Cre (stock number 031125-UCD), and from Jax Mice, Ai32(RCL-  
550 ChR2(H134R)/EYFP) (Stock number 012569) and Ai9(RCL-tdTomato) (7905). All of them were  
551 crossbred in-house for at least 10 generations prior to their use in our experiments. Mice were  
552 kept under a standard 12 h light/dark cycle with food and water ad libitum. Behavioral testing  
553 occurred during the light period.

### 554 ***Electrophysiological recordings***

555 Male and female mice were used for whole-cell recordings. Coronal slices of 300  $\mu\text{m}$  thickness  
556 containing the dorsal raphe were cut using a vibratome (Leica VT1200) in “ice cold” solution  
557 containing (in mM): 2.5 KCl, 1.25  $\text{NaH}_2\text{PO}_4$ , 26  $\text{NaHCO}_3$ , 10 D-glucose, 230 Sucrose, 0.5  
558  $\text{CaCl}_2$ , 10  $\text{MgSO}_4$ , and bubbled with 5%  $\text{CO}_2$  and 95%  $\text{O}_2$ . Slices were recovered in ACSF  
559 containing (in mM): 127 NaCl, 2.5 KCl, 25  $\text{NaHCO}_3$ , 1.25  $\text{NaH}_2\text{PO}_4$ , 25 Glucose, 2  $\text{CaCl}_2$ , 1  
560  $\text{MgCl}_2$  at 34 °C for 30 minutes and then kept in the same solution at room temperature until  
561 transferred to the recording chamber. In addition, 300 $\mu\text{M}$  L-Tryptophan (Sigma) was added to  
562 the ACSF to maintain serotonergic tone in the ex vivo preparation as described elsewhere (Liu  
563 et al., 2005).

564 Patch recording pipettes (resistance 3-5  $\text{M}\Omega$ ) were filled with internal solution containing (in  
565 mM): 135 K-Gluconate, 10 HEPES, 10 Na-Phosphocreatine, 3 Na-L-Ascorbate, 4  $\text{MgCl}_2$ , 4  
566  $\text{Na}_2\text{-ATP}$ , and 0.4 Na-GTP. Data were acquired using a Multiclamp 700B amplifier and digitized

567 at 10 kHz with a Digidata 1440a digitizer (both from Molecular Devices). Data was then either  
568 analyzed using Clampfit 10.7 Software (Molecular Devices, LLC) or imported into Matlab and  
569 analyzed with custom-written software.

570 Every voltage-clamp recording contained a 100ms test pulse of -10mV for offline calculation of  
571 access and series resistance to ensure the same recording quality across experiments.

572 The access resistance ( $R_a$ ) was determined by measuring the amplitude of the current  
573 response to the command voltage step and the membrane resistance ( $R_m$ ) as the difference  
574 between the baseline and the holding current in the steady state after the capacitive decay, by  
575 applying Ohm's law. Input resistance was the sum of the membrane resistance with the pipette  
576 resistance. The membrane time constant ( $\tau$ ) was determined by a single exponential fit of the  
577 decay phase in response to the square pulse. An approximation of the capacitance was  
578 obtained using the following formula:

$$579 \quad \text{Tau} = \text{Access Resistance} * \text{Input Capacitance}$$

580 Only neurons with access resistance 1/10th lower than the membrane resistance were used for  
581 analysis. Only neurons with an access resistance lower than 30M $\Omega$  were considered for  
582 analysis. The access resistance was comparable between neurons recorded at different  
583 developmental stages (ANOVA,  $F(3,119)=1.78$ ,  $p=0.15$ ).

584 Neurons were recorded at a holding membrane voltage of -70mV, near the reversal potential of  
585 chloride (-68mV) and thus, optogenetically evoked responses correspond to AMPA-mediated  
586 currents.

587 To activate ChR2-expressing fibers, light from a 473-nm fiber-coupled laser (PSU-H-FDA, CNI  
588 Laser) was delivered at approximately 2mm from the sample to produce wide-field illumination  
589 of the recorded cell (Fig. 2A). TTL triggered pulses of light (10-ms duration; 10 mW measured at  
590 the fiber tip, which was located approximately 2 mm away from the sample) were delivered at  
591 the recording site at 0.1Hz of frequency. Neurons were recorded in the dorsomedial and lateral

592 wings portions of the DRN, in two consecutive coronal slices per mouse between bregma levels  
593 ~4.3 and ~4.8 (Fig. S1).

594 To assess ChR2 evoked photocurrent in layer V somas, mPFC slices were obtained using the  
595 same slicing procedure. 1  $\mu$ M TTX was added to the bath to prevent escaped spikes in the  
596 voltage clamp recordings upon light activation.

## 597 ***Histology***

598 Mice were deeply anesthetized with pentobarbital (Eutasil) and perfused transcardially with 4%  
599 paraformaldehyde (P6148, Sigma-Aldrich). The brain was removed from the skull, stored in 4%  
600 paraformaldehyde for two hours before being transferred to cryoprotectant solution (30%  
601 sucrose in PBS) until they sank. Sagittal sections (50  $\mu$ m) were cut with a freezing sliding  
602 microtome (SM2000, Leica).

603 For axonal quantification in Rbp4-ChR2, we performed anti-GFP immunostaining to enhance  
604 the intrinsic signal of the ChR2-fused EYFP reporter. We incubated overnight with the anti-GFP  
605 primary antibody at 4 degrees (1:1000, A-6455 Invitrogen, 0.1M PBS 0.3% tx100, 3% NGS).  
606 After abundant PBS washes, we incubated the secondary biotinylated anti-Rabbit antibody  
607 (711-065-152, Jackson IRL) for 2-4 hours in the same incubation solution at room temperature  
608 and finally, after PBS washes, slices were incubated in Alexa488 Streptavidin for 2-4 hours in  
609 the same incubation solution at room temperature (S32354, Invitrogen). After final PBS washes,  
610 slices were mounted and covered with FluoroGel mounting medium (17985-10, Electron  
611 Microscopy Sciences) for posterior imaging.

## 612 ***Image acquisition and analysis***

613 Histological sections were imaged with a Zeiss LSM 710 confocal laser scanning microscope  
614 using 10x and 25x magnification objectives.

615 To quantify the axonal density, images containing the DRN or the nucleus accumbens were  
616 background subtracted and binarized using constant thresholds in Fiji. After thresholding, binary  
617 images were imported into Matlab and analyzed with custom written software. Images were  
618 sampled every 100um across the Y axis. The intersections between binary axons and these  
619 sampling lines across the Y axis were counted and averaged in bins of 100um to estimate  
620 axonal density.

621 Quantification of layer V soma densities was obtained in histological slices of Rbp4-tdTomato  
622 mice. Confocal images were imported into matlab, and fluorescent somas were detected using  
623 the image analysis toolbox of Matlab inside a defined region of interest containing the mPFC  
624 (PL/IL). The number of somas was then divided by the area of the ROI to obtain the density of  
625 neurons.

### 626 ***Stereotaxic surgeries and virus injection***

627 Animals were anesthetized with isoflurane (2% induction and 0.5 - 1% for maintenance) and  
628 placed in a motorized computer-controlled Stoelting stereotaxic instrument with mouse brain  
629 atlas integration and real-time surgery probe visualization in the atlas space (Neurostar,  
630 Sindelfingen, Germany; <https://www.neurostar.de>). Antibiotic (Enrofloxacin, 2.5-5 mg/Kg, S.C.),  
631 pain killer (Buprenorphine, 0.1 mg/Kg, S.C.), and local anesthesia over the scalp (0.2 ml,  
632 2% Lidocaine, S.C.) were administered before incising the scalp. Virus injection (experiment  
633 group: AAV2retro-flex-EF1A-taCasp3-TEVp; control group: AAV2retro-flex-hSyn-tdTomato) was  
634 targeted to DRN at the following coordinates: -4.7 mm AP, 0.0 mm ML, and 3.1 mm DV. The  
635 vertical stereotaxic arm was tilted 32 degrees caudally to reach the target avoiding Superior  
636 sagittal sinus and Transverse sinuses. Target coordinates were adjusted as follows: -6.64 mm  
637 AP, 0.0 mm ML, and -4.02 mm DV. To infect a larger volume of the DRN with the virus, we  
638 performed six injections of 0.2 uL using two entry points along the AP axis (-6.54 and -6.74) and  
639 3 depths along the DV axis (-4.02, -3.92, and -3.82). The incision was then closed using tissue

640 adhesive (VETBOND<sup>TM/MC</sup>, 3M, No. 1469SB). Mice were monitored until recovery from the  
641 surgery and returned to their homecages, where they were housed individually. Behavioral  
642 testing started at least 1 week after surgery to allow for recovery.

### 643 ***Behavioral testing***

644 The behavioral box consisted of 1 back-wall (16x219 cm), 2 side-walls (16.7x219 cm), and 2  
645 front-walls (10x219 cm, 140-degree angle between them), made of white acrylic (0.5 cm thick)  
646 and a transparent acrylic lead. A camera (ELP camera, ELP-USBFHD01M-L180) was mounted  
647 on top of the ceiling for monitoring purposes. Each front wall had a nose-poke port equipped  
648 with an infrared emitter/sensor pairs to report port entry and exit times (model 007120.0002,  
649 Island motion corporation) and a water valve for water delivery (LHDA1233115H, The Lee  
650 Company, Westbrook, CT). An internal white acrylic wall (8cm) separates the two nose-poke  
651 ports forcing the animals to walk around it to travel between ports. All signals from sensors were  
652 processed by Arduino Mega 2560 microcontroller board (Arduino, Somerville, US), and outputs  
653 from the Arduino Mega 2560 microcontroller board were implemented to control water delivery  
654 in drops of 4 $\mu$ l. Arduino Mega 2560 microcontroller was connected to the sensors and  
655 controllers through an Arduino Mega 2560 adaptor board developed by the Champalimaud  
656 Foundation Scientific Hardware Platform.

657 Subjects have to probe two foraging sites (nose-poke ports, for mice, or virtual magic wands, for  
658 humans) to obtain rewards (4  $\mu$ l water drops, for mice, or virtual points for humans). At any  
659 given time, only one of the sites is active and, when probed, delivers a reward with a fixed 90%  
660 probability ( $P_{REW}$ ). Each attempt also triggers a fixed 90% probability of transition ( $P_{TRS}$ ) to  
661 inactivate the current foraging site and activate the other. These transitions are not cued; thus,  
662 subjects are required to alternate probing the current site and traveling to the other to track the  
663 hidden active state and obtain rewards. In this work, we focus on assessing differences in the

664 baseline patience/impulsivity, measured as the ability to withhold adverse outcomes. Therefore  
665 naive subjects were only tested once.  
666 Five days before testing, water dispensers were removed from the animals' home cages, and  
667 their weights were recorded. In the following days, progressively less water (1000µl, 800µl,  
668 600µl) was given in a metal dish inside the homecage. Weight loss was monitored every day  
669 before water delivery, and no animal lost more than 20% of their body weight. On the fifth day of  
670 water deprivation, animals were weighed and introduced to the behavioral box. A small quantity  
671 of water was present at the start of the session to stimulate the mice to probe the nose-ports.  
672 Sessions lasted a minimum of one hour. By that time, if animals did not perform at least 30  
673 trials, the session was extended for thirty more minutes.  
674 Animals were handled during water deprivation to reduce stress levels, but they were  
675 completely naive about the task environment and functioning on the testing day. One juvenile  
676 female mouse was excluded from the experiment batch before the task assessment because of  
677 congenital blindness. One caspase adult mouse was excluded after the task assessment  
678 because of abnormal behavior. Rather than nose poking to seek water, this animal spent most  
679 of the task time biting the nose port, to anomalous levels. In chronological order, we tested a  
680 batch of only male juvenile and adult animals, followed by testing of male and female tdTomato  
681 and Caspase animals, and finally only female juvenile and adult animals. Separate analysis for  
682 females and males on the effect of age reveals that juveniles are less persistent in both cases.

### 683 ***Data and statistical analysis***

684 Behavioral data analysis was performed using custom-written scripts in Julia-1.4.1.  
685 Behavioral results were represented as median  $\pm$  95% confidence intervals, and statistical  
686 significance was accepted for p-values < 0.05. The statistical analysis was done in Julia-1.4.1  
687 (Bezanson et al., 2017) with the HypothesisTests (<https://juliastats.org/HypothesisTests.jl/v0.9/>)



688 and MixedModels (Bates et al., 2021) existing packages. The effect of a specific factor on the  
689 probability of leaving was tested by applying logistic regression on a generalized linear mixed-  
690 effects model (GLMM), using a Bernoulli distribution for the dependent variable and a Logit link  
691 function. For each foraging nose poke we assigned a boolean label according to whether the  
692 animal left the patch after that poke (True) or not (False). We then use logistic regression to  
693 explain this leaving choice for each poke according to the elapsed time in the trial (PokeTime),  
694 the elapsed trials in the session (Trial), the animal group (Age or Virus) and their interactions.  
695 This statistical approach allows us to examine the question of behavioral persistence in terms of  
696 probability of leaving after each single poke, expanding the amount of usable data, per animal  
697 and counterbalancing the limitation of studying the phenomenon in naive animals exposed to a  
698 single session. Furthermore this technique can test for both additive and multiplicative effects of  
699 the factors contributing to behavioral persistence. The individual variability was accounted for  
700 through generalized linear mixed models with random intercept and slopes for each mouse (see  
701 methods for the implementation). Before testing we checked for co-linearity between the  
702 continuous predictors and confirmed that there was no correlation between the time of poking  
703 (Poke Time) and trials elapsed from the beginning of the session (Trial)  
704 (PokeTime~1+Trial+(1+Trial|MouseID):  $p = 0.99$ , Fig, S3B). First, to assess the significance of  
705 the estimated coefficients, we calculated their 95% CI by performing a parametric bootstrap of  
706 1000 samples. Only factors whose CI did not include 0 were considered to be significantly  
707 affecting the probability of leaving. Next, to validate the relevance of the experimental  
708 manipulation (age or virus), we compared nested models (a general model and a special case  
709 model, excluding or including the experimental factor, respectively) using a likelihood ratio test:  
710 chi-squared test on the difference of the deviance of the two nested models, with degrees of  
711 freedom equal to the difference in degrees of freedom between the general model (lacking the  
712 predictor) and its special case (with the predictor of interest). For each analysis, we report the

713 median and 95% CI of the median for the groups of interest, followed by the test statistics. We  
714 use Wilkinson annotation to describe the models with denoting random effects.  
715  
716 Electrophysiological and histological results were analyzed with Matlab and Graphpad Software.  
717 Normality of the residuals was tested with the D'Agostino-Pearson omnibus K2 test. When  
718 normally distributed, either a t-test, one-way ANOVA or repeated measures ANOVA were  
719 performed to compare groups at different developmental phases. In the cases where residuals  
720 were not normally distributed, we performed a Mann-Whitney or Kruskal Wallis test to assess  
721 significance. For testing differences in connection probability, a Chi-square test was performed.  
722 Finally, a Kolmogorov Smirnov test was performed to compare the neuronal density distribution  
723 between Caspase treated animals and tdTomato expressing controls. Error bar plots represent  
724 mean  $\pm$  SEM. Significance was noted as \* $p < 0.05$ .

## 725 **Acknowledgements**

726 We thank Drs. Cindy Poo and Constanze Lenschow for helpful comments on the manuscript  
727 and the Champalimaud Foundation Advanced Bio-optics and Bio-imaging platform for the  
728 microscopy technical assistance. This work was supported by the Champalimaud Foundation  
729 (Z.F.M.), European Research Council (671251, Z.F.M.), Fundação para a Ciência e Tecnologia  
730 (FCT-PTDC/MED-NEU/28830/2017, Z.F.M.; SFRH / BD / 132172 / 2017, D.S.). This work was  
731 further supported by Portuguese national funds Fundação para a Ciência e a Tecnologia (FCT;  
732 UIDB/04443/2020); CONGENTO, co-financed by Lisboa Regional Operational Programme  
733 (Lisboa2020), under the PORTUGAL 2020 Partnership Agreement, through the European  
734 Regional Development Fund (ERDF) and Fundação para a Ciência e Tecnologia (Portugal)  
735 under the project LISBOA-01-0145-FEDER-022170, the imaging platform has been financed  
736 under the project LISBOA-01-0145-FEDER-022122.

## Competing interests

The authors declare that no competing interests exist.

## Author contributions

NGC, DS and ZFM designed the research. NGC, DS and BSG performed the research. NGC and DS analyzed the data. NGC, DS and ZFM wrote the paper.

## References

- Aguillon-Rodriguez, V., Angelaki, D., Bayer, H., Bonacchi, N., Carandini, M., Cazes, F., Chapuis, G., Churchland, A. K., Dan, Y., Dewitt, E., Faulkner, M., Forrest, H., Haetzel, L., Häusser, M., Hofer, S. B., Hu, F., Khanal, A., Krasniak, C., Laranjeira, I., ... Zador, A. M. (2021). Standardized and reproducible measurement of decision-making in mice. *ELife*, 10. <https://doi.org/10.7554/eLife.63711>
- Alexander-Bloch, A., Giedd, J. N., & Bullmore, E. (2013). Imaging structural co-variance between human brain regions. *Nature Reviews Neuroscience*, 14(5), 322–336. <https://doi.org/10.1038/nrn3465>
- Arruda-Carvalho, M., Wu, W. C., Cummings, K. A., & Clem, R. L. (2017). Optogenetic examination of prefrontal-amygdala synaptic development. *Journal of Neuroscience*, 37(11), 2976–2985. <https://doi.org/10.1523/JNEUROSCI.3097-16.2017>
- Ashwell, R., & Ito, R. (2014). Excitotoxic lesions of the infralimbic, but not prelimbic cortex facilitate reversal of appetitive discriminative context conditioning: the role of the infralimbic cortex in context generalization. *Frontiers in Behavioral Neuroscience*, 8(FEB), 63. <https://doi.org/10.3389/fnbeh.2014.00063>
- Bari, B. A., Grossman, C. D., Lubin, E. E., Rajagopalan, A. E., Cressy, J. I., & Cohen, J. Y. (2019). Stable Representations of Decision Variables for Flexible Behavior. *Neuron*, 103(5), 922-933.e7. <https://doi.org/10.1016/j.neuron.2019.06.001>
- Bates, D., Alday, P., Kleinschmidt, D., Calderón, J. B. S., Zhan, L., Noack, A., Arslan, A., Bouchet-Valat, M., Kelman, T., Baldassari, A., Ehinger, B., Karrasch, D., Saba, E., Quinn, J., Hatherly, M., Piibeleht, M., Mogensen, P. K., Babayan, S., & Gagnon, Y. L. (2021). JuliaStats/MixedModels.jl: v3.8.0. <https://doi.org/https://doi.org/10.5281/zenodo.4767255>

- Bell, M. R. (2018). Comparing Postnatal Development of Gonadal Hormones and Associated Social Behaviors in Rats, Mice, and Humans. *Endocrinology*, 159(7), 2596–2613. <https://doi.org/10.1210/EN.2018-00220>
- Berlin, H. A. (2004). Impulsivity, time perception, emotion and reinforcement sensitivity in patients with orbitofrontal cortex lesions. *Brain*, 127(5), 1108–1126. <https://doi.org/10.1093/brain/awh135>
- Bezanson, J., Edelman, A., Karpinski, S., & Shah, V. B. (2017). Julia: A Fresh Approach to Numerical Computing. *SIAM Review*, 59(1), 65–98. <https://doi.org/10.1137/141000671>
- Bitzenhofer, S. H., Pöplau, J. A., Chini, M., Marquardt, A., & Hanganu-Opatz, I. L. (2021). A transient developmental increase in prefrontal activity alters network maturation and causes cognitive dysfunction in adult mice. *Neuron*, 109(8), 1350-1364.e6. <https://doi.org/10.1016/j.neuron.2021.02.011>
- Capuzzo, G., & Floresco, S. B. (2020). Prelimbic and Infralimbic Prefrontal Regulation of Active and Inhibitory Avoidance and Reward-Seeking. *The Journal of Neuroscience*, 40(24), 4773–4787. <https://doi.org/10.1523/JNEUROSCI.0414-20.2020>
- Casey, B. J., Somerville, L. H., Gotlib, I. H., Ayduk, O., Franklin, N. T., Askren, M. K., Jonides, J., Berman, M. G., Wilson, N. L., Teslovich, T., Glover, G., Zayas, V., Mischel, W., & Shoda, Y. (2011). Behavioral and neural correlates of delay of gratification 40 years later. *Proceedings of the National Academy of Sciences*, 108(36), 14998–15003. <https://doi.org/10.1073/pnas.1108561108>
- Celada, P., Puig, M. V., Casanovas, J. M., Guillazo, G., & Artigas, F. (2001). Control of Dorsal Raphe Serotonergic Neurons by the Medial Prefrontal Cortex: Involvement of Serotonin-1A, GABAA, and Glutamate Receptors. *The Journal of Neuroscience*, 21(24), 1–13. <https://doi.org/10.1523/JNEUROSCI.21-24-09917.2001>
- Challis, C., Beck, S. G., & Berton, O. (2014). Optogenetic modulation of descending prefrontocortical inputs to the dorsal raphe bidirectionally bias socioaffective choices after social defeat. *Frontiers in Behavioral Neuroscience*, 8(FEB), 1–14. <https://doi.org/10.3389/fnbeh.2014.00043>
- Chen, F., Ke, J., Qi, R., Xu, Q., Zhong, Y., Liu, T., Li, J., Zhang, L., & Lu, G. (2018). Increased Inhibition of the Amygdala by the mPFC may Reflect a Resilience Factor in Post-traumatic Stress Disorder: A Resting-State fMRI Granger Causality Analysis. *Frontiers in Psychiatry*, 9, 516. <https://doi.org/10.3389/fpsy.2018.00516>
- Chini, M., & Hanganu-Opatz, I. L. (2021). Prefrontal Cortex Development in Health and Disease: Lessons from Rodents and Humans. *Trends in Neurosciences*, 44(3), 227–240. <https://doi.org/10.1016/j.tins.2020.10.017>
- Ciamelli, E., De Luca, F., Kwan, D., Mok, J., Bianconi, F., Knyagnytska, V., Craver, C., Green, L., Myerson, J., & Rosenbaum, R. S. (2021). The role of ventromedial prefrontal cortex

- in reward valuation and future thinking during intertemporal choice. *ELife*, 10, 1–17. <https://doi.org/10.7554/eLife.67387>
- Dalley, J. W., & Robbins, T. W. (2017). Fractionating impulsivity : neuropsychiatric implications. *Nature Publishing Group*, 18(3), 158–171. <https://doi.org/10.1038/nrn.2017.8>
- De Kock, C. P. J., Cornelisse, L. N., Burnashev, N., Lodder, J. C., Timmerman, A. J., Couey, J. J., Mansvelder, H. D., & Brussaard, A. B. (2006). NMDA receptors trigger neurosecretion of 5-HT within dorsal raphé nucleus of the rat in the absence of action potential firing. *The Journal of Physiology*, 577(3), 891–905. <https://doi.org/10.1113/jphysiol.2006.115311>
- Dincheva, I., Drysdale, A. T., Hartley, C. A., Johnson, D. C., Jing, D., King, E. C., Ra, S., Gray, J. M., Yang, R., DeGruccio, A. M., Huang, C., Cravatt, B. F., Glatt, C. E., Hill, M. N., Casey, B. J., & Lee, F. S. (2015). FAAH genetic variation enhances fronto-amygdala function in mouse and human. *Nature Communications*, 6(1), 6395. <https://doi.org/10.1038/ncomms7395>
- Durston, S., & Casey, B. J. (2006). What have we learned about cognitive development from neuroimaging? *Neuropsychologia*, 44(11), 2149–2157. <https://doi.org/10.1016/J.NEUROPSYCHOLOGIA.2005.10.010>
- Fair, D. A., Cohen, A. L., Power, J. D., Dosenbach, N. U. F., Church, J. A., Miezin, F. M., Schlaggar, B. L., & Petersen, S. E. (2009). Functional Brain Networks Develop from a “Local to Distributed” Organization. *PLoS Computational Biology*, 5(5), e1000381. <https://doi.org/10.1371/journal.pcbi.1000381>
- Fellows, L. K. (2006). Deciding how to decide: Ventromedial frontal lobe damage affects information acquisition in multi-attribute decision making. *Brain*, 129(4), 944–952. <https://doi.org/10.1093/brain/awl017>
- Ferguson, B. R., & Gao, W.-J. (2015). Development of thalamocortical connections between the mediodorsal thalamus and the prefrontal cortex and its implication in cognition. *Frontiers in Human Neuroscience*, 8(JAN). <https://doi.org/10.3389/fnhum.2014.01027>
- Fonseca, M. S., Murakami, M., & Mainen, Z. F. (2015). Activation of dorsal raphe serotonergic neurons promotes waiting but is not reinforcing. *Current Biology*, 25(3), 306–315. <https://doi.org/10.1016/j.cub.2014.12.002>
- Geddes, S. D., Assadzada, S., Lemelin, D., Sokolovski, A., Bergeron, R., Haj-Dahmane, S., & Béique, J.-C. (2016). Target-specific modulation of the descending prefrontal cortex inputs to the dorsal raphe nucleus by cannabinoids. *Proceedings of the National Academy of Sciences*, 113(19), 5429–5434. <https://doi.org/10.1073/pnas.1522754113>
- Gee, D. G., Fetcho, R. N., Jing, D., Li, A., Glatt, C. E., Drysdale, A. T., Cohen, A. O., Dellarco, D. V., Yang, R. R., Dale, A. M., Jernigan, T. L., Lee, F. S., & Casey, B. J. (2016). Individual differences in frontolimbic circuitry and anxiety emerge with adolescent

- changes in endocannabinoid signaling across species. *Proceedings of the National Academy of Sciences*, 113(16), 4500–4505. <https://doi.org/10.1073/pnas.1600013113>
- Giustino, T. F., & Maren, S. (2015). The Role of the Medial Prefrontal Cortex in the Conditioning and Extinction of Fear. *Frontiers in Behavioral Neuroscience*, 9(NOVEMBER). <https://doi.org/10.3389/fnbeh.2015.00298>
- Gonçalves, L., Nogueira, M. I., Shammah-Lagnado, S. J., & Metzger, M. (2009). Prefrontal afferents to the dorsal raphe nucleus in the rat. *Brain Research Bulletin*, 78(4–5), 240–247. <https://doi.org/10.1016/j.brainresbull.2008.11.012>
- Gorelova, N., & Yang, C. . (1996). The course of neural projection from the prefrontal cortex to the nucleus accumbens in the rat. *Neuroscience*, 76(3), 689–706. [https://doi.org/10.1016/S0306-4522\(96\)00380-6](https://doi.org/10.1016/S0306-4522(96)00380-6)
- Guirado, R., Perez-Rando, M., Ferragud, A., Gutierrez-Castellanos, N., Umemori, J., Carceller, H., Nacher, J., & Castillo-Gómez, E. (2020). A Critical Period for Prefrontal Network Configurations Underlying Psychiatric Disorders and Addiction. *Frontiers in Behavioral Neuroscience*, 14, 51. <https://doi.org/10.3389/fnbeh.2020.00051>
- Hamani, C., Diwan, M., Macedo, C. E., Brandão, M. L., Shumake, J., Gonzalez-Lima, F., Raymond, R., Lozano, A. M., Fletcher, P. J., & Nobrega, J. N. (2010). Antidepressant-Like Effects of Medial Prefrontal Cortex Deep Brain Stimulation in Rats. *Biological Psychiatry*, 67(2), 117–124. <https://doi.org/10.1016/J.BIOPSYCH.2009.08.025>
- Hvoslef-Eide, M., Nilsson, S. R. O., Hailwood, J. M., Robbins, T. W., Saksida, L. M., Mar, A. C., & Bussey, T. J. (2018). Effects of anterior cingulate cortex lesions on a continuous performance task for mice. *Brain and Neuroscience Advances*, 2, 239821281877296. <https://doi.org/10.1177/2398212818772962>
- Hwang, K., Velanova, K., & Luna, B. (2010). Strengthening of Top-Down Frontal Cognitive Control Networks Underlying the Development of Inhibitory Control: A Functional Magnetic Resonance Imaging Effective Connectivity Study. *Journal of Neuroscience*, 30(46), 15535–15545. <https://doi.org/10.1523/JNEUROSCI.2825-10.2010>
- Itami, S., & Uno, H. (2002). Orbitofrontal cortex dysfunction in attention-deficit hyperactivity disorder revealed by reversal and extinction tasks. *NeuroReport*, 13(18), 2453–2457. <https://doi.org/10.1097/00001756-200212200-00016>
- Izquierdo, A., Brigman, J. L., Radke, A. K., Rudebeck, P. H., & Holmes, A. (2017). The neural basis of reversal learning: An updated perspective. *Neuroscience*, 345(March), 12–26. <https://doi.org/10.1016/j.neuroscience.2016.03.021>
- Jin, Y., Luo, B., Su, Y.-Y., Wang, X.-X., Chen, L., Wang, M., Wang, W.-W., & Chen, L. (2015). Sodium Salicylate Suppresses GABAergic Inhibitory Activity in Neurons of Rodent Dorsal Raphe Nucleus. *PLOS ONE*, 10(5), e0126956. <https://doi.org/10.1371/journal.pone.0126956>

- Johnson, C., & Wilbrecht, L. (2011). Juvenile mice show greater flexibility in multiple choice reversal learning than adults. *Developmental Cognitive Neuroscience*, 1(4), 540–551. <https://doi.org/10.1016/j.dcn.2011.05.008>
- Klune, C. B., Jin, B., & DeNardo, L. A. (2021). Linking mPFC circuit maturation to the developmental regulation of emotional memory and cognitive flexibility. *ELife*, 10, 1–33. <https://doi.org/10.7554/eLife.64567>
- Kolk, S. M., & Rakic, P. (2021). Development of prefrontal cortex. *Neuropsychopharmacology*, 1–17. <https://doi.org/10.1038/s41386-021-01137-9>
- KW, M., K, M., & K, D. (2012). Activation of dorsal raphe serotonin neurons is necessary for waiting for delayed rewards. *The Journal of Neuroscience : The Official Journal of the Society for Neuroscience*, 32(31), 10451–10457. <https://doi.org/10.1523/JNEUROSCI.0915-12.2012>
- Larsen, B., & Luna, B. (2018). Adolescence as a neurobiological critical period for the development of higher-order cognition. *Neuroscience & Biobehavioral Reviews*, 94, 179–195. <https://doi.org/10.1016/j.neubiorev.2018.09.005>
- Laviola, G., Macrì, S., Morley-Fletcher, S., & Adriani, W. (2003). Risk-taking behavior in adolescent mice: psychobiological determinants and early epigenetic influence. *Neuroscience & Biobehavioral Reviews*, 27(1–2), 19–31. [https://doi.org/10.1016/S0149-7634\(03\)00006-X](https://doi.org/10.1016/S0149-7634(03)00006-X)
- Leone, D. P., Heavner, W. E., Ferenczi, E. A., Dobрева, G., Huguenard, J. R., Grosschedl, R., & McConnell, S. K. (2015). *Satb2* Regulates the Differentiation of Both Callosal and Subcerebral Projection Neurons in the Developing Cerebral Cortex. *Cerebral Cortex*, 25(10), 3406–3419. <https://doi.org/10.1093/cercor/bhu156>
- Li, B., Nguyen, T. P., Ma, C., & Dan, Y. (2020). Inhibition of impulsive action by projection-defined prefrontal pyramidal neurons. *Proceedings of the National Academy of Sciences of the United States of America*, 117(29), 17278–17287. <https://doi.org/10.1073/PNAS.2000523117/-/DCSUPPLEMENTAL>
- Li, Z., Chen, Z., Fan, G., Li, A., Yuan, J., & Xu, T. (2018). Cell-Type-Specific Afferent Innervation of the Nucleus Accumbens Core and Shell. *Frontiers in Neuroanatomy*, 12. <https://doi.org/10.3389/fnana.2018.00084>
- Lottem, E., Banerjee, D., Vertechi, P., Sarra, D., Lohuis, M. oude, & Mainen, Z. F. (2018). Activation of serotonin neurons promotes active persistence in a probabilistic foraging task. *Nature Communications*, 9(1), 1000. <https://doi.org/10.1038/s41467-018-03438-y>
- Luna, B., Marek, S., Larsen, B., Tervo-Clemmens, B., & Chahal, R. (2015). An Integrative Model of the Maturation of Cognitive Control. *Annual Review of Neuroscience*, 38(1), 151–170. <https://doi.org/10.1146/annurev-neuro-071714-034054>

- Luna, B., Thulborn, K. R., Munoz, D. P., Merriam, E. P., Garver, K. E., Minshew, N. J., Keshavan, M. S., Genovese, C. R., Eddy, W. F., & Sweeney, J. A. (2001). Maturation of widely distributed brain function subserves cognitive development. *NeuroImage*, 13(5), 786–793. <https://doi.org/10.1006/nimg.2000.0743>
- Maier, S. F. (2015). Behavioral control blunts reactions to contemporaneous and future adverse events: Medial prefrontal cortex plasticity and a corticostriatal network. *Neurobiology of Stress*, 1(1), 12–22. <https://doi.org/10.1016/j.ynstr.2014.09.003>
- Mischel, W., Shoda, Y., & Rodriguez, M. L. (1989). Delay of Gratification in Children. ii, 21–26.
- Miyazaki, K. K. W., Miyazaki, K. K. W., Tanaka, K. F., Yamanaka, A., Takahashi, A., Tabuchi, S., & Doya, K. (2014). Optogenetic activation of dorsal raphe serotonin neurons enhances patience for future rewards. *Current Biology*, 24(17), 2033–2040. <https://doi.org/10.1016/j.cub.2014.07.041>
- Miyazaki, K., Miyazaki, K. W., Yamanaka, A., Tokuda, T., Tanaka, K. F., & Doya, K. (2018). Reward probability and timing uncertainty alter the effect of dorsal raphe serotonin neurons on patience. *Nature Communications*, 9(1). <https://doi.org/10.1038/s41467-018-04496-y>
- Miyazaki, K. W., Miyazaki, K., & Doya, K. (2011). Activation of the central serotonergic system in response to delayed but not omitted rewards. *European Journal of Neuroscience*, 33(1), 153–160. <https://doi.org/10.1111/j.1460-9568.2010.07480.x>
- Moffitt, T. E., Arseneault, L., Belsky, D., Dickson, N., Hancox, R. J., Harrington, H., Houts, R., Poulton, R., Roberts, B. W., Ross, S., Sears, M. R., Thomson, W. M., & Caspi, A. (2011). A gradient of childhood self-control predicts health, wealth, and public safety. *Proceedings of the National Academy of Sciences*, 108(7), 2693–2698. <https://doi.org/10.1073/pnas.1010076108>
- Morris, D. W., & Davidson, D. L. (2000). Optimally Foraging Mice Match Patch Use with Habitat Differences in Fitness. *Ecology*, 81(8), 2061. <https://doi.org/10.2307/177095>
- Muir, J. L., Everitt, B. J., & Robbins, T. W. (1996). The Cerebral Cortex of the Rat and Visual Attentional Function: Dissociable Effects of Medial Frontal, Cingulate, Anterior Dorsolateral, and Parietal Cortex Lesions on a Five-Choice Serial Reaction Time Task. *Cerebral Cortex*, 6(3), 470–481. <https://doi.org/10.1093/cercor/6.3.470>
- Muir, J., Lopez, J., & Bagot, R. C. (2019). Wiring the depressed brain: optogenetic and chemogenetic circuit interrogation in animal models of depression. *Neuropsychopharmacology*, 44(6), 1013–1026. <https://doi.org/10.1038/s41386-018-0291-6>
- Murakami, M., Shteingart, H., Loewenstein, Y., & Mainen, Z. F. (2017). Distinct Sources of Deterministic and Stochastic Components of Action Timing Decisions in Rodent Frontal Cortex. *Neuron*, 94(4), 908–919.e7. <https://doi.org/10.1016/j.neuron.2017.04.040>



- Nagy, Z., Westerberg, H., & Klingberg, T. (2004). Maturation of White Matter is Associated with the Development of Cognitive Functions during Childhood. *Journal of Cognitive Neuroscience*, 16(7), 1227–1233. <https://doi.org/10.1162/0898929041920441>
- Nakayama, H., Ibañez-Tallon, I., & Heintz, N. (2018). Cell-Type-Specific Contributions of Medial Prefrontal Neurons to Flexible Behaviors. *The Journal of Neuroscience*, 38(19), 4490–4504. <https://doi.org/10.1523/JNEUROSCI.3537-17.2018>
- Narayanan, N. S., Horst, N. K., & Laubach, M. (2006). Reversible inactivations of rat medial prefrontal cortex impair the ability to wait for a stimulus. *Neuroscience*, 139(3), 865–876. <https://doi.org/10.1016/j.neuroscience.2005.11.072>
- Narayanan, N. S., Cavanagh, J. F., Frank, M. J., & Laubach, M. (2013). Common medial frontal mechanisms of adaptive control in humans and rodents. *Nature Neuroscience*, 16(12), 1888–1895. <https://doi.org/10.1038/nn.3549>
- Nishitani, N., Nagayasu, K., Asaoka, N., Yamashiro, M., Andoh, C., Nagai, Y., Kinoshita, H., Kawai, H., Shibui, N., Liu, B., Hewinson, J., Shirakawa, H., Nakagawa, T., Hashimoto, H., Kasparov, S., & Kaneko, S. (2019). Manipulation of dorsal raphe serotonergic neurons modulates active coping to inescapable stress and anxiety-related behaviors in mice and rats. *Neuropsychopharmacology*, 44(4), 721–732. <https://doi.org/10.1038/s41386-018-0254-y>
- Ohmura, Y., Tsutsui-Kimura, I., Sasamori, H., Nebuka, M., Nishitani, N., Tanaka, K. F., Yamanaka, A., & Yoshioka, M. (2020). Different roles of distinct serotonergic pathways in anxiety-like behavior, antidepressant-like, and anti-impulsive effects. *Neuropharmacology*, 167(July), 107703. <https://doi.org/10.1016/j.neuropharm.2019.107703>
- Peixoto, R. T., Wang, W., Croney, D. M., Kozorovitskiy, Y., & Sabatini, B. L. (2016). Early hyperactivity and precocious maturation of corticostriatal circuits in Shank3B<sup>-/-</sup> mice. *Nature Neuroscience*, 19(5), 716–724. <https://doi.org/10.1038/nn.4260>
- Petreaanu, L., Mao, T., Sternson, S. M., & Svoboda, K. (2009). The subcellular organization of neocortical excitatory connections. *Nature*, 457(7233), 1142–1145. <https://doi.org/10.1038/nature07709>
- Phillipson, O. T., & Griffiths, A. C. (1985). The topographic order of inputs to nucleus accumbens in the rat. *Neuroscience*, 16(2), 275–296. [https://doi.org/10.1016/0306-4522\(85\)90002-8](https://doi.org/10.1016/0306-4522(85)90002-8)
- Pittaras, E., Rabat, A., & Granon, S. (2020). The Mouse Gambling Task: Assessing Individual Decision-making Strategies in Mice. *Bio-Protocol*, 10(1). <https://doi.org/10.21769/BIOPROTOCOL.3479>
- Pollak Dorocic, I., Fürth, D., Xuan, Y., Johansson, Y., Pozzi, L., Silberberg, G., Carlén, M., & Meletis, K. (2014). A Whole-Brain Atlas of Inputs to Serotonergic Neurons of the Dorsal

- and Median Raphe Nuclei. *Neuron*, 83(3), 663–678.  
<https://doi.org/10.1016/j.neuron.2014.07.002>
- Puig, M. V., & Gullledge, A. T. (2011). Serotonin and prefrontal cortex function: neurons, networks, and circuits. *Molecular Neurobiology*, 44(3), 449–464.  
<https://doi.org/10.1007/S12035-011-8214-0>
- Ren, J., Friedmann, D., Xiong, J., Liu, C. D., Ferguson, B. R., Weerakkody, T., DeLoach, K. E., Ran, C., Pun, A., Sun, Y., Weissbourd, B., Neve, R. L., Huguenard, J., Horowitz, M. A., & Luo, L. (2018). Anatomically Defined and Functionally Distinct Dorsal Raphe Serotonin Sub-systems. *Cell*, 175(2), 472–487.e20. <https://doi.org/10.1016/j.cell.2018.07.043>
- Roberts, A. C., Robbins, T. W., & Weiskrantz, L. (1998). The Prefrontal Cortex: Executive and Cognitive Functions. In A. C. Roberts, T. W. Robbins, & L. Weiskrantz (Eds.), *The Prefrontal Cortex Executive and Cognitive Functions*. Oxford University Press.  
<https://doi.org/10.1093/ACPROF:OSO/9780198524410.001.0001>
- Rudebeck, P. H., Saunders, R. C., Prescott, A. T., Chau, L. S., & Murray, E. A. (2013). Prefrontal mechanisms of behavioral flexibility, emotion regulation and value updating. *Nature Neuroscience*, 16(8), 1140–1145. <https://doi.org/10.1038/nn.3440>
- Rutter, M., Beckett, C., Castle, J., Colvert, E., Kreppner, J., Mehta, M., Stevens, S., & Sonuga-Barke, E. (2007). Effects of profound early institutional deprivation: An overview of findings from a UK longitudinal study of Romanian adoptees. *European Journal of Developmental Psychology*, 4(3), 332–350. <https://doi.org/10.1080/17405620701401846>
- Sackett, D. A., Moschak, T. M., & Carelli, R. M. (2019). Prelimbic Cortical Neurons Track Preferred Reward Value and Reflect Impulsive Choice during Delay Discounting Behavior. *The Journal of Neuroscience*, 39(16), 3108–3118.  
<https://doi.org/10.1523/JNEUROSCI.2532-18.2019>
- Sakurai, T., & Gamo, N. J. (2019). Cognitive functions associated with developing prefrontal cortex during adolescence and developmental neuropsychiatric disorders. *Neurobiology of Disease*, 131, 104322. <https://doi.org/10.1016/j.nbd.2018.11.007>
- Sanchez-Roige, S., Peña-Oliver, Y., & Stephens, D. N. (2012). Measuring impulsivity in mice: the five-choice serial reaction time task. *Psychopharmacology*, 219(2), 253–270.  
<https://doi.org/10.1007/s00213-011-2560-5>
- Sasamori, H., Ohmura, Y., Kubo, T., Yoshida, T., & Yoshioka, M. (2018). Assessment of impulsivity in adolescent mice: A new training procedure for a 3-choice serial reaction time task. *Behavioural Brain Research*, 343, 61–70.  
<https://doi.org/10.1016/j.bbr.2018.01.014>
- Schweighofer, N., Bertin, M., Shishida, K., Okamoto, Y., Tanaka, S. C., Yamawaki, S., & Doya, K. (2008). Low-Serotonin Levels Increase Delayed Reward Discounting in Humans.

- Journal of Neuroscience, 28(17), 4528–4532. <https://doi.org/10.1523/JNEUROSCI.4982-07.2008>
- Sercombe, H. (2014). Risk, adaptation and the functional teenage brain. *Brain and Cognition*, 89, 61–69. <https://doi.org/10.1016/j.bandc.2014.01.001>
- Soiza-Reilly, M., Meye, F. J., Olusakin, J., Telley, L., Petit, E., Chen, X., Mameli, M., Jabaudon, D., Sze, J. Y., & Gaspar, P. (2019). SSRIs target prefrontal to raphe circuits during development modulating synaptic connectivity and emotional behavior. *Molecular Psychiatry*, 24(5), 726–745. <https://doi.org/10.1038/s41380-018-0260-9>
- Sowell, E. R., Thompson, P. M., Holmes, C. J., Jernigan, T. L., & Toga, A. W. (1999). In vivo evidence for post-adolescent brain maturation in frontal and striatal regions. *Nature Neuroscience*, 2(10), 859–861. <https://doi.org/10.1038/13154>
- Spear, L. P. (2000). Neurobehavioral Changes in Adolescence. *Current Directions in Psychological Science*, 9(4), 111–114. <https://doi.org/10.1111/1467-8721.00072>
- Srejic, L. R., Hamani, C., & Hutchison, W. D. (2015). High-frequency stimulation of the medial prefrontal cortex decreases cellular firing in the dorsal raphe. *European Journal of Neuroscience*, 41(9), 1219–1226. <https://doi.org/10.1111/ejn.12856>
- Tooley, U. A., Bassett, D. S., & Mackey, A. P. (2021). Environmental influences on the pace of brain development. *Nature Reviews Neuroscience*, 22(6), 372–384. <https://doi.org/10.1038/s41583-021-00457-5>
- Ueda, S., Niwa, M., Hioki, H., Sohn, J., Kaneko, T., Sawa, A., & Sakurai, T. (2015). Sequence of Molecular Events during the Maturation of the Developing Mouse Prefrontal Cortex. *Molecular Neuropsychiatry*, 1(2), 94–104. <https://doi.org/10.1159/000430095>
- van der Veen, B., Kapanaiyah, S. K. T., Kilonzo, K., Steele-Perkins, P., Jendryka, M. M., Schulz, S., Tasic, B., Yao, Z., Zeng, H., Akam, T., Nicholson, J. R., Liss, B., Nissen, W., Pekcec, A., & Kätzel, D. (2021). Control of impulsivity by Gi-protein signalling in layer-5 pyramidal neurons of the anterior cingulate cortex. *Communications Biology*, 4(1), 662. <https://doi.org/10.1038/s42003-021-02188-w>
- Velanova, K., Wheeler, M. E., & Luna, B. (2008). Maturation Changes in Anterior Cingulate and Frontoparietal Recruitment Support the Development of Error Processing and Inhibitory Control. *Cerebral Cortex*, 18(11), 2505–2522. <https://doi.org/10.1093/cercor/bhn012>
- Verharen, J. P. H., den Ouden, H. E. M., Adan, R. A. H., & Vanderschuren, L. J. M. J. (2020). Modulation of value-based decision making behavior by subregions of the rat prefrontal cortex. *Psychopharmacology*, 237(5), 1267–1280. <https://doi.org/10.1007/s00213-020-05454-7>
- Vertechi, P., Lottem, E., Sarra, D., Godinho, B., Treves, I., Quendera, T., Oude Lohuis, M. N., & Mainen, Z. F. (2020). Inference-Based Decisions in a Hidden State Foraging Task:

- Differential Contributions of Prefrontal Cortical Areas. *Neuron*, 106(1), 166-176.e6. <https://doi.org/10.1016/j.neuron.2020.01.017>
- Warden, M. R., Selimbeyoglu, A., Mirzabekov, J. J., Lo, M., Thompson, K. R., Kim, S. Y., Adhikari, A., Tye, K. M., Frank, L. M., & Deisseroth, K. (2012). A prefrontal cortex-brainstem neuronal projection that controls response to behavioural challenge. *Nature*, 492(7429), 428–432. <https://doi.org/10.1038/nature11617>
- Warthen, D. M., Lambeth, P. S., Ottolini, M., Shi, Y., Barker, B. S., Gaykema, R. P., Newmyer, B. A., Joy-Gaba, J., Ohmura, Y., Perez-Reyes, E., Güler, A. D., Patel, M. K., & Scott, M. M. (2016). Activation of Pyramidal Neurons in Mouse Medial Prefrontal Cortex Enhances Food-Seeking Behavior While Reducing Impulsivity in the Absence of an Effect on Food Intake. *Frontiers in Behavioral Neuroscience*, 10(MAR). <https://doi.org/10.3389/fnbeh.2016.00063>
- Weissbourd, B., Ren, J., DeLoach, K. E., Guenther, C. J., Miyamichi, K., & Luo, L. (2014). Presynaptic Partners of Dorsal Raphe Serotonergic and GABAergic Neurons. *Neuron*, 83(3), 645–662. <https://doi.org/10.1016/j.neuron.2014.06.024>
- Winstanley, C. A., & Floresco, S. B. (2016). Deciphering Decision Making: Variation in Animal Models of Effort- and Uncertainty-Based Choice Reveals Distinct Neural Circuitries Underlying Core Cognitive Processes. *Journal of Neuroscience*, 36(48), 12069–12079. <https://doi.org/10.1523/JNEUROSCI.1713-16.2016>
- Wong, M. M., Nigg, J. T., Zucker, R. A., Puttler, L. I., Fitzgerald, H. E., Jester, J. M., Glass, J. M., & Adams, K. (2006). Behavioral Control and Resiliency in the Onset of Alcohol and Illicit Drug Use: A Prospective Study From Preschool to Adolescence. *Child Development*, 77(4), 1016–1033. <https://doi.org/10.1111/j.1467-8624.2006.00916.x>
- Yang, C. F., Chiang, M. C., Gray, D. C., Prabhakaran, M., Alvarado, M., Juntti, S. A., Unger, E. K., Wells, J. A., & Shah, N. M. (2013). Sexually Dimorphic Neurons in the Ventromedial Hypothalamus Govern Mating in Both Sexes and Aggression in Males. *Cell*, 153(4), 896–909. <https://doi.org/10.1016/j.cell.2013.04.017>
- Young, H., Belbut, B., Baeta, M., & Petreanu, L. (2021). Laminar-specific cortico-cortical loops in mouse visual cortex. *ELife*, 10, 1–25. <https://doi.org/10.7554/eLife.59551>
- Zhou, L., Liu, M.-Z., Li, Q., Deng, J., Mu, D., & Sun, Y.-G. (2017). Organization of Functional Long-Range Circuits Controlling the Activity of Serotonergic Neurons in the Dorsal Raphe Nucleus. *Cell Reports*, 18(12), 3018–3032. <https://doi.org/10.1016/j.celrep.2017.02.077>
- Zuo, X.-N., Kelly, C., Di Martino, A., Mennes, M., Margulies, D. S., Bangaru, S., Grzadzinski, R., Evans, A. C., Zang, Y.-F., Castellanos, F. X., & Milham, M. P. (2010). Growing Together and Growing Apart: Regional and Sex Differences in the Lifespan Developmental Trajectories of Functional Homotopy. *Journal of Neuroscience*, 30(45), 15034–15043. <https://doi.org/10.1523/JNEUROSCI.2612-10.2010>

Zuo, X.-N., He, Y., Betzel, R. F., Colcombe, S., Sporns, O., & Milham, M. P. (2017). Human Connectomics across the Life Span. *Trends in Cognitive Sciences*, 21(1), 32–45. <https://doi.org/10.1016/j.tics.2016.10.005>

## Supplementary Figures

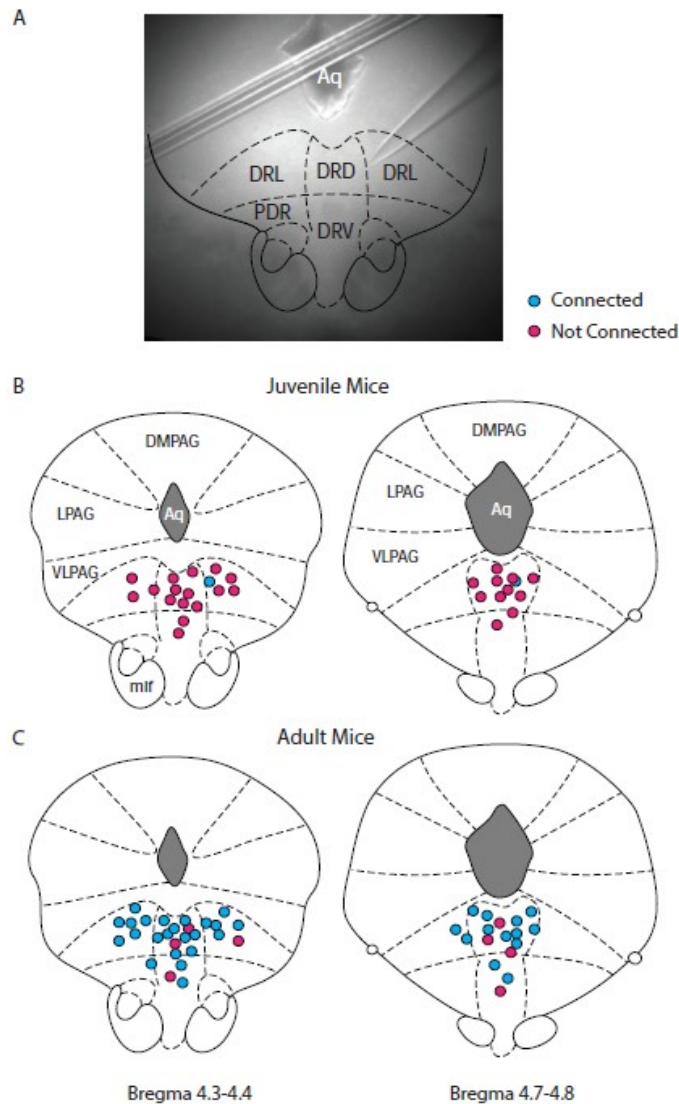

737 **Supplementary Figure 1. Changes in cortico-raphe connectivity over development are**  
738 **not explained by changes in the location of the recorded DRN neurons.** (A) Example low  
739 magnification picture taken of a recorded DRN neuron and overlaid atlas inset used to  
740 determine its location. (B,C) Summary of the spatial location and connectivity of the recorded

741 DRN neurons in juvenile (anterior DRN connected/non-connected = 1/16, posterior DRN  
742 connected/non-connected = 1/11) and adult (anterior DRN connected/non-connected=23/4,  
743 posterior DRN connected/non-connected = 13/4) mice.

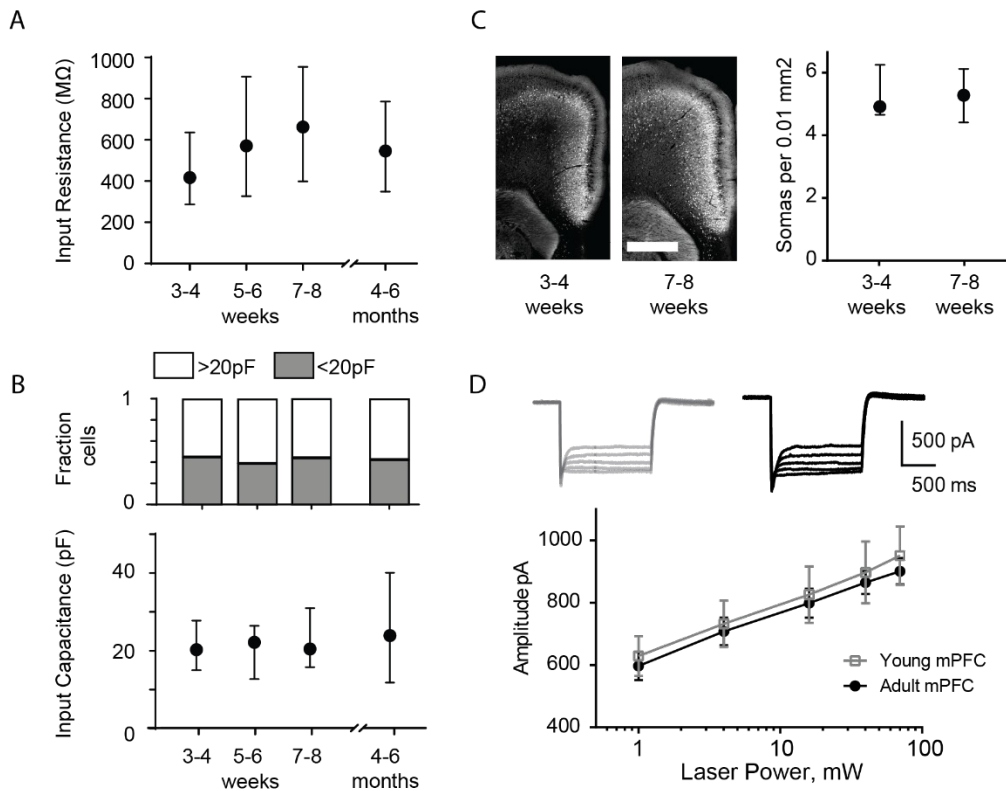

744 **Supplementary Figure 2. Changes in cortico-raphe connectivity over development are**  
 745 **not explained by changes in membrane properties of DRN neurons or by differential**  
 746 **Chr2 expression of Chr2 under the Rbp4 promoter over time.** (A) The input resistance of  
 747 DRN neurons is comparable over time. (B) The fraction of putative 5HT neurons  
 748 (Capacitance>20pF) and non-5HT neurons (Capacitance<20pF) (Soiza-Reilly et al., 2019)  
 749 recorded is comparable across developmental stages (Fraction of neurons with  
 750 Capacitance>20pF: 3-4 weeks= 0.55, 5-6 weeks= 0.62, 7-8 weeks= 0.54, 5-6 months= 0.6. Chi-  
 751 Square test  $\chi^2$  (3, N=122 neurons) =0.59, p=0.89)). In addition, no overall changes in input  
 752 capacitance were observed in DRN neurons across development. (C) The density of fluorescent  
 753 mPFC layer V neurons is comparable in juvenile and adult Rbp4-tdTomato mice. (D) The  
 754 evoked photocurrent in mPFC layer V neurons of juvenile and adult Rbp4-ChR2 mice is virtually  
 755 identical across a wide range of stimulation intensities. Error bars in A-C represent median and  
 756 95% CI. Error bars in D represent mean  $\pm$  SEM. Scale bar in C = 800 microns.

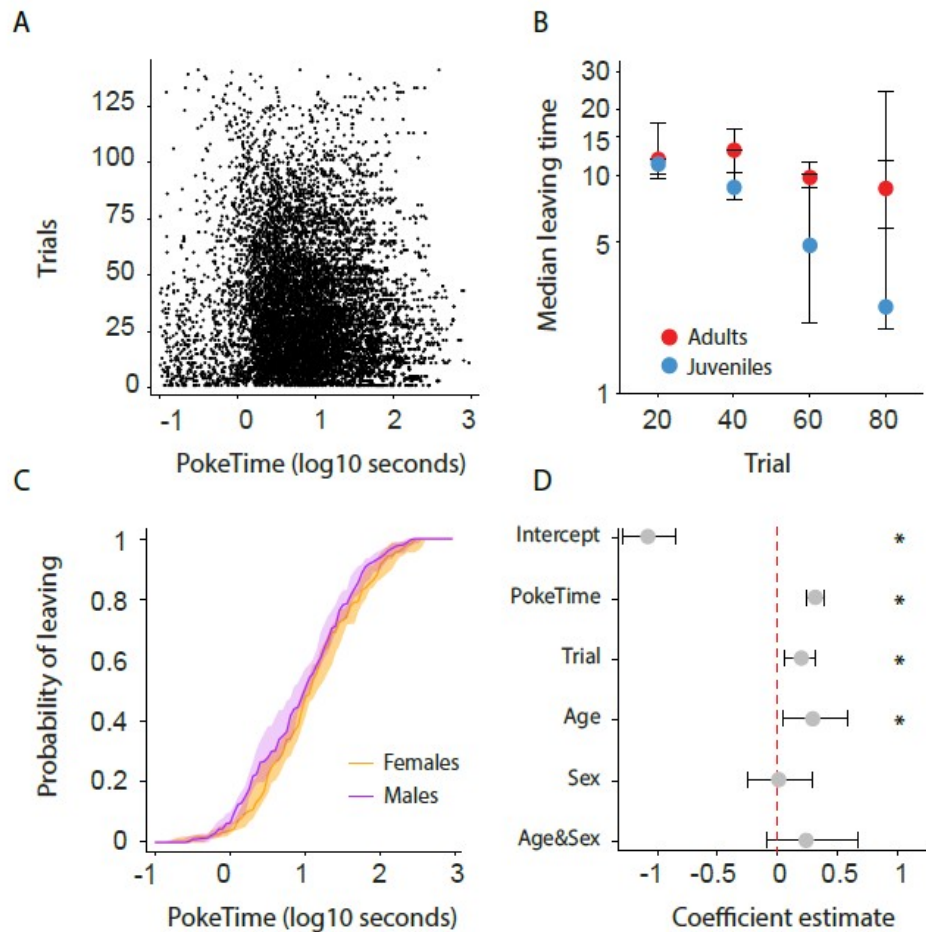

757 **Supplementary Figure 3. Description of poking behavior over the session progression**  
758 **and according to sex.** (A) Individual poke durations for all mice. (B) Leaving time (median  $\pm$   
759 95% CI across mice) as a function of elapsed trials in a session. (C) Cumulative distribution of  
760 the probability of leaving as a function of trial time elapsed (median  $\pm$  95% CI across mice) for  
761 female and male mice. (D) Regression coefficients  $\pm$  95% CI resulting from a parametric  
762 bootstrap ( $n = 1000$ ) of a mixed models logistic regression to explain the probability of leaving.  
763 Note the lack of explanatory power for the group variable sex.



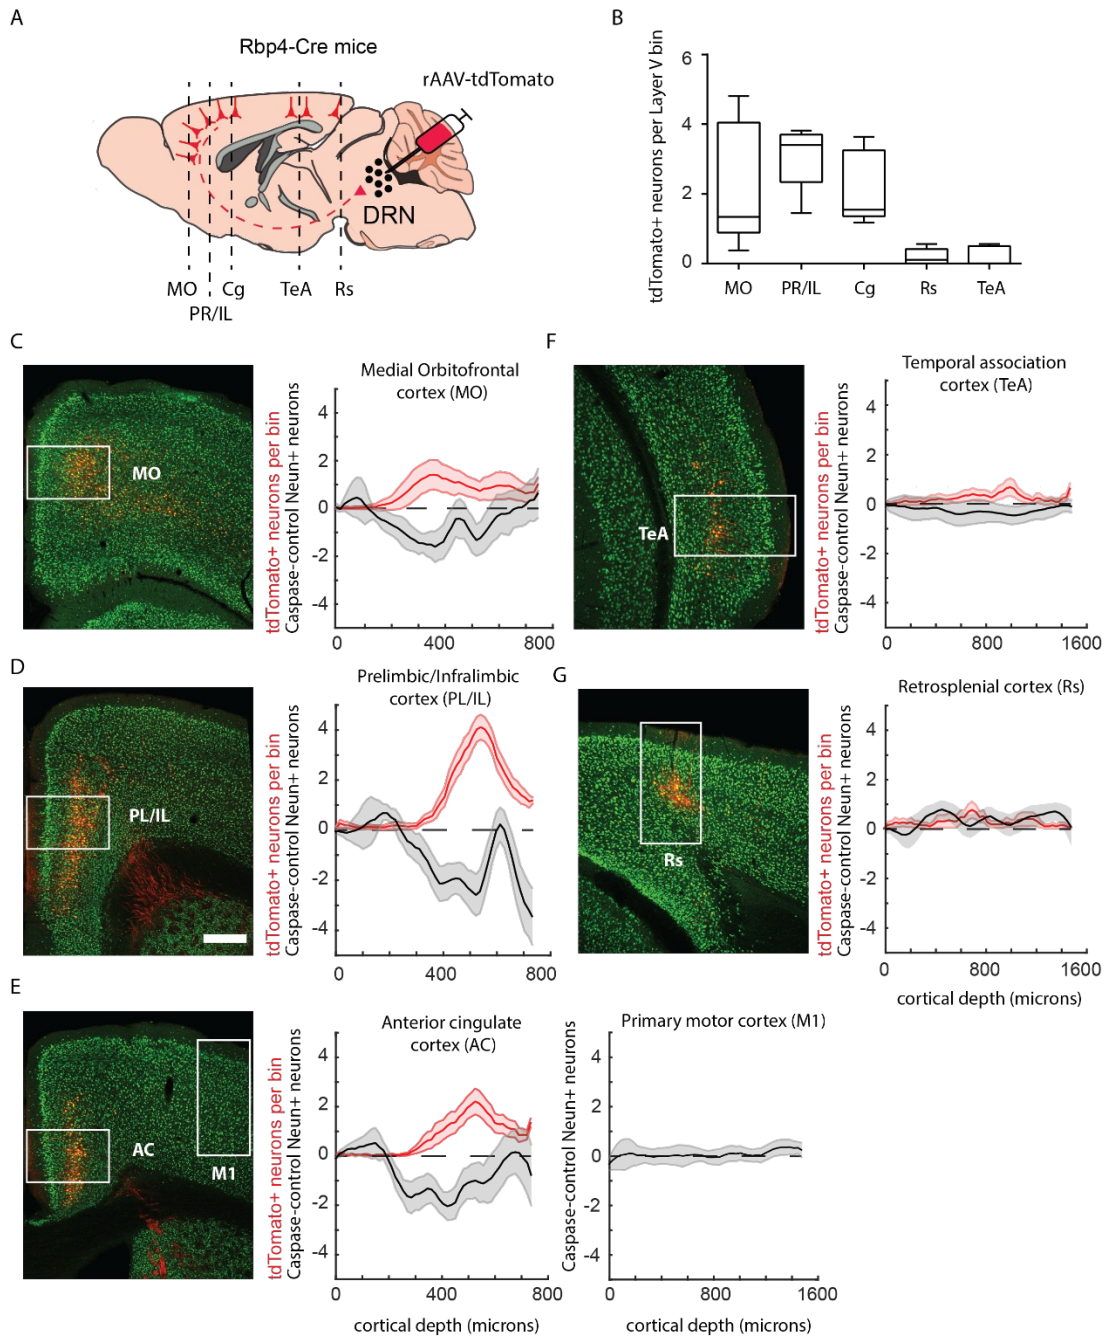

764 **Supplementary Figure 4. Labeling of Rbp4-expressing DRN projecting neurons with**  
 765 **rAAV-tdTomato is consistent with cell density loss in mice injected with rAAV-Caspase3.**  
 766 (A) Schematic representation of rAAV-tdTomato dependent labeling of cortico-DRN projecting  
 767 neurons in Rbp4-Cre mice. (B) Quantification of layer V tdTomato labeled somas across the  
 768 different DRN projecting cortical areas (n = 8 mice). Example picture of the immunolabeling

769 obtained with the pan-neuronal marker NeuN and the virally expressed tdTomato reporter  
770 together with the quantification across cortical depth of tdTomato cell density and neuronal loss  
771 (NeuN density in rAAV-Caspase3 injected mice - average NeuN density of control mice, n=7  
772 caspase mice) for the medial orbitofrontal cortex (C, Control vs. Caspase Two-sample  
773 Kolmogorov-Smirnoff Test,  $D = 0.017$ ,  $p = 0.08$ ), prelimbic/infralimbic cortex (D,  $D = 0.028$ ,  $p =$   
774  $0.002$ ), cingulate cortex and motor primary cortex (E,  $D = 0.024$ ,  $p = 0.01$  and  $D = 0.019$ ,  $p =$   
775  $0.15$ , respectively), temporal association cortex (F,  $D = 0.025$ ,  $p = 0.19$ ) and retrosplenial cortex  
776 (G,  $D = 0.034$ ,  $p = 0.12$ ). Box plots represent median, IQR, and min/max data range. Shaded  
777 error plots represent mean  $\pm$  SEM. Scale bar = 400 microns.

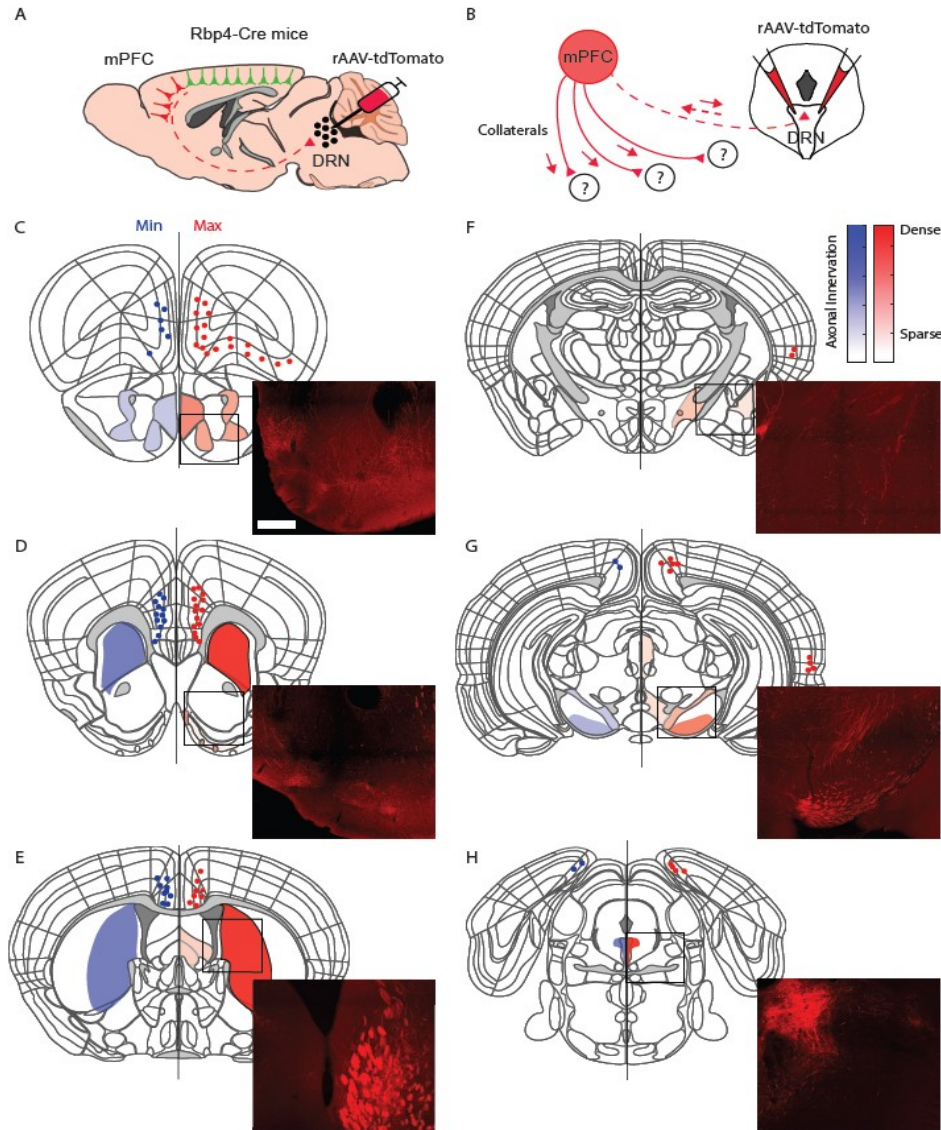

778 **Supplementary Figure 5. Dorsal raphe projecting cortical neurons have dense collateral**  
779 **projections to the striatum.** (A) Schematic representation of rAAV-tdTomato dependent  
780 labeling of cortico-DRN projecting neurons in Rbp4-Cre mice. (B) Schematic representation of  
781 axon collaterals from the same cortical subpopulation of neurons retrogradely labeled at the  
782 DRN. (C-H) Semiquantitative representation of axon collateral innervation density across the  
783 anteroposterior levels of the mouse brain presenting the injections with the highest (red) and  
784 lowest (blue) density of retrogradely labeled neurons. Scale bar= 500 microns.
